# Supplementary material for: A spiroborate-based anionic bis-N-heterocyclic carbene
Source: Royal Society of Chemistry journal article supplement (doi:10.1039/c3dt52131a), 2013-12-10

**Supporting Information**  
**for**  
**A Spiroborate-Based Anionic Bis-N-Heterocyclic Carbene**

Jia-Hong Su, Gene-Hsiang Lee, Shie-Ming Peng, Ching-Wen Chiu\*

Department of Chemistry, National Taiwan University, No. 1, Sec. 4,  
Roosevelt Rd., Taipei, Taiwan, 10617.

### General Information:

Air and moisture sensitive reactions were carried out under an atmosphere of N<sub>2</sub> using standard Schlenk techniques or inside a glovebox. Toluene and dichloromethane were dried via passing through the molecular sieves packed drying column under nitrogen. THF and THF-*d*<sub>8</sub> were dried using Na/K alloy, and distilled under inert atmosphere. <sup>1</sup>H, <sup>11</sup>B, and <sup>13</sup>C NMR spectra were recorded using Bruker Avance III 400 MHz NMR, Bruker AVIII 500MHz FT-NMR and Bruker AVIII 800MHz NMR. The <sup>1</sup>H, and <sup>13</sup>C NMR spectra reported in ppm (δ) are relative to the chemical shift of solvent residual signals for CDCl<sub>3</sub> at 7.26 and 77.00 ppm, [*d*<sub>6</sub>]DMSO at 2.50 and 39.52 ppm, [*d*<sub>8</sub>]THF at 3.58, 1.73 ppm, 25.4, 67.6 ppm, and [*d*<sub>4</sub>]MeOH at 4.78, 3.31 ppm and 49.2 ppm. The elemental analysis was recorded on Thermo Flash 2000. The HR-ESI-MS was recorded on Bruker micrOTOF-QII. The infrared spectra were recorded using BOMEM MB-series.

**X-ray Crystallography:** Diffraction data were collected at T = 150(2) K with a Bruker AXS APEX CCD diffractometer equipped with a rotation anode using graphite-monochromated Mo-Kα radiation (λ = 0.71073 Å). Diffraction data were collected over the full sphere and were corrected for absorption. Cell parameters were retrieved and refined using DENZO-SMN software on all reflections. Data reduction was performed with DENZO-SMN software. Structural analysis was conducted using the SHELXS program on a personal computer. All the structures were solved and refined using the SHELXL-97 program by full-matrix least-squares on F<sup>2</sup> values. Hydrogen atoms were placed geometrically and refined using a riding model. Crystallographic data have been deposited at the Cambridge Crystallographic Data Center with deposition number CCDC-950338, CCDC-950339, and CCDC-950340, for [1][Br], [2][Br], and K[4], respectively. These data can be obtained free of charge from The Cambridge Crystallographic Data Centre via [www.ccdc.cam.ac.uk/data\\_request/cif](http://www.ccdc.cam.ac.uk/data_request/cif). The relatively high wR2 value for [2][Br] and K[4] was due to the presence of volatile solvent molecules in the crystal lattice that resulted in crystal cracking during the mounting process. Although the R values for both structures were not perfect, we were able to precisely determine the unit cell parameters by using a large amount of reflections (27631 reflections for [2][Br], and 25545 reflections for K[4]).

### Synthesis of 4,5-dimethoxy-*N,N'*-dimesityl-1,2-benzenediamine

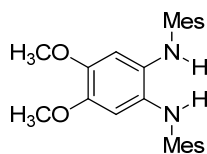

A catalyst for Buchwald-Hartwig coupling reaction was prepared by charging a 100 mL Schlenk flask with 1,3-bis(2,6-diisopropylphenyl)imidazol-2-ylidene (1.44 g, 3.4 mmol), Pd(OAc)<sub>2</sub> (0.39 g, 1.7 mmol), sodium *tert*-butoxide (0.49 g, 5.1 mmol) and toluene (30 mL), and then refluxed for 30 minutes. The resulting mixture was transferred into a 300 mL flask containing 4,5-dibromoveratrole (5.00 g, 17 mmol), sodium *tert*-butoxide (4.87 g, 51 mmol) in toluene (150 mL). Then 2,4,6-trimethylaniline (4.7 mL, 34 mmol) was added subsequently. The resulting mixture was heated at 110 °C for 16 h. After cooling to ambient temperature, the reaction mixture was quenched with saturated aqueous NH<sub>4</sub>Cl (150 mL), and added 100 mL diethyl ether. The organic layer was then washed with 2 x 50 mL deionized water. The combined organic layer was dried over MgSO<sub>4</sub>, filtered and concentrated under vacuum to yield brown oil. The crude product was recrystallized from methanol at -40 °C, and the product was collected as an off-white solid (6.24 g, yield 91 %) after filtration. <sup>1</sup>H NMR (CDCl<sub>3</sub>, 400 MHz): δ 7.01 (s, 4H, Ar-H), δ 6.09 (s, 2H, Ar-H), δ 5.07 (s, 2H, NH), δ 3.68 (s, 6H, CH<sub>3</sub>), δ 2.37 (s, 6H, CH<sub>3</sub>), δ 2.27 (s, 12H, CH<sub>3</sub>). <sup>13</sup>C NMR (CDCl<sub>3</sub>, 100 MHz): δ 143.1, 137.3, 133.4, 132.7, 129.4, 128.9, 101.9, 56.7, 20.7, 18.1 ppm.

### Synthesis of 5,6-dimethoxy-1,3-dimesitylbenzimidazolium tetrafluoroborate

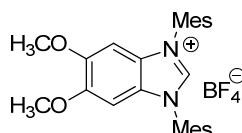

As-synthesized 4,5-dimethoxy-*N,N'*-dimesityl-1,2-benzenediamine (6.24 g, 15.4 mmol) was dissolved in the excess amount of triethyl orthoformate (40 mL). Then adding excess amount of HBF<sub>4</sub>·etherate (5 mL) and stirred for overnight at room temperature. After reaction, the mixture was poured into diethyl ether (150 mL) to yield precipitates. The solids were collected by filtration and washed with diethyl ether, and was further purified by recrystallization from methanol and diethyl ether to give **3a** as an off-white solid (5.2 g, yield 67 %). <sup>1</sup>H NMR ([*d*<sub>6</sub>]DMSO, 400 MHz): δ 9.90 (s, 1H, CH), δ 7.28 (s, 4H, Ar-H), δ 6.90 (s, 2H, Ar-H), δ 3.82 (s, 6H, CH<sub>3</sub>), δ 2.41 (s, 6H, CH<sub>3</sub>) δ 2.06 (s, 12H, CH<sub>3</sub>). <sup>13</sup>C NMR ([*d*<sub>6</sub>]DMSO, 100 MHz): δ 151.2, 140.9, 140.8, 135.2, 129.7, 128.2, 124.9, 94.6, 56.6, 20.7, 16.8 ppm. HR-ESI-MS: *m/z* calc. for [C<sub>27</sub>H<sub>31</sub>N<sub>2</sub>O<sub>2</sub>]<sup>+</sup>: 415.2380; Found: 415.2387.

### Synthesis of 5,6-dihydroxy-1,3-dimesitylbenzimidazolium bromide [1][Br]

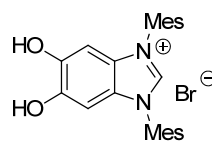

To a solution of 5,6-dimethoxy-1,3-dimesitylbenzimidazolium tetrafluoroborate (3.0 g, 6 mmol) in dried dichloromethane (30 mL), 1 M BBr<sub>3</sub> in dichloromethane (12 mL, 13 mmol) was added dropwise at -78 °C. The colour of the mixture changed from dark green to brown. After addition of BBr<sub>3</sub>, the mixture was slowly warmed to room temperature, and stirred for additional 1 hour. After reaction, all volatile species were evaporated under vacuum. The solid residual was re-dissolved in methanol. After 30 minutes, deionized water was added till precipitates formed. The crude product was collected as an off-white solid after filtration, and was further purified by recrystallization from methanol and diethyl ether (2.7 g, yield 97 %). Single crystals were obtained from a methanol/ether solution of [1][Br] at room temperature. <sup>1</sup>H NMR ([d<sub>6</sub>]DMSO, 400 MHz): δ 10.20 (s, 2H, OH), δ 9.89 (s, 1H, CH), δ 7.27 (s, 4H, Ar-H), δ 6.66 (s, 2H, Ar-H), δ 2.40 (s, 6H, CH<sub>3</sub>) δ 2.06 (s, 12H, CH<sub>3</sub>). <sup>13</sup>C NMR ([d<sub>6</sub>]DMSO, 100 MHz): δ 149.0, 141.4, 140.6, 135.5, 130.2, 128.8, 124.8, 97.5, 21.2, 17.2 ppm. Anal. Calc. for C<sub>25</sub>H<sub>27</sub>BrN<sub>2</sub>O<sub>2</sub>·H<sub>2</sub>O: C, 61.86; H, 6.02; N, 5.77; Found: C, 62.85; H, 5.79; N, 5.72.

### Synthesis of [2][Br] from benzenediboronic acid

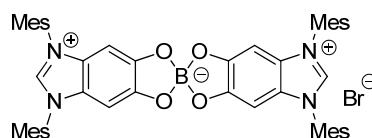

Benzenediboronic acid (90 mg, 0.54 mmol), [1][Br] (500 mg, 1.07 mmol) and 20 mL ethanol were added into a 50 mL round-bottom flask that was equipped with a Dean-Stark apparatus. The mixture was refluxed overnight. All volatiles were removed under vacuum. The crude product was purified by recrystallization from methanol and diethyl ether, and then washed with THF for several times to yield [2][Br] as off-white solids (401 mg, yield 87 %). Single crystals suitable for X-ray diffraction analysis were obtained from an ethyl acetate/ether/acetone solution of [2][Br] at room temperature. <sup>1</sup>H NMR ([d<sub>6</sub>]DMSO, 400 MHz): δ 9.74 (s, 2H, CH), δ 7.25 (s, 8H, Ar-H), δ 6.48 (s, 4H, Ar-H), δ 2.39 (s, 12H, CH<sub>3</sub>), δ 2.05 (s, 24H, CH<sub>3</sub>). <sup>13</sup>C NMR ([d<sub>6</sub>]DMSO, 100 MHz): δ 153.3, 140.7, 138.1, 135.1, 129.6, 128.6, 124.5, 90.8, 20.7, 16.7. <sup>11</sup>B NMR ([d<sub>6</sub>]DMSO, 128 MHz): δ 15 ppm. Anal. Calc. for C<sub>50</sub>H<sub>50</sub>BBrN<sub>4</sub>O<sub>4</sub>: C, 69.69; H, 5.85; N, 6.50; Found: C, 68.93; H, 5.83; N, 6.39.

### Synthesis of [2][Br] from phenylboronic acid

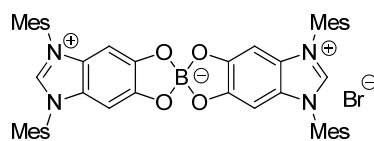

Phenylboronic acid (27 mg, 0.22 mmol), [1][Br] (200 mg, 0.43 mmol) and 10 mL ethanol were added into a 25 mL round-bottom flask that was equipped with a Dean-Stark apparatus. The mixture was refluxed overnight. All volatiles were removed under vacuum. The crude product was purified by recrystallization from methanol and diethyl ether, and then washed with THF for several times to yield [2][Br] as off-white solids (159 mg, yield 86 %).

### Synthesis of anionic bis-NHC K[3]

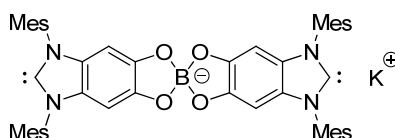

To a 25 mL Schlenk flask containing [2][Br] (100 mg, 0.12 mmol) in 10 mL dried THF was added 0.26 mL of 1 M THF solution of KHMDS (0.26 mL, 0.24 mmol). The mixture was allowed to stir at room temperature for 16 hours. The resulting solution was filtered through 0.22  $\mu$ m syringe filter. The collected filtrate was dried under vacuum to give product as a white solid (86 mg, yield 90 %). <sup>1</sup>H NMR ([*d*<sub>8</sub>]THF, 500 MHz):  $\delta$  7.00 (s, 8H, Ar-H),  $\delta$  6.04 (s, 4H, Ar-H),  $\delta$  2.34 (s, 12H, CH<sub>3</sub>),  $\delta$  2.02 (s, 24H, CH<sub>3</sub>). <sup>13</sup>C NMR ([*d*<sub>8</sub>]THF, 125 MHz):  $\delta$  224.5 (carbene), 149.9, 137.6, 137.5, 136.6, 129.3, 128.3, 90.9, 21.0, 17.9 ppm. <sup>11</sup>B NMR ([*d*<sub>8</sub>]THF, 128 MHz):  $\delta$  15 ppm.

### Synthesis of di-borane adduct K[4]

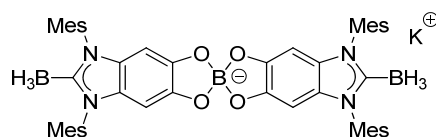

To a 50 mL Schlenk flask charging with 100 mg of [2][Br] (0.12 mmol) and 10 mL of dried THF was added 28 mg of KO<sup>t</sup>Bu (0.24 mmol). After stirring at room temperature for 30 minutes, BH<sub>3</sub>(SMe<sub>2</sub>) (2 M solution in THF, 0.21 mL, 0.48 mmol) was added slowly at ambient temperature. The resulting mixture was allowed to stir for overnight. The precipitates slowly formed during reaction, and was collected after reaction by filtration to yield K[4] as a white solid (56 mg, yield 57 %). Single crystal was obtained from a methanol/ether solution of K[4] at room temperature. <sup>1</sup>H NMR ([*d*<sub>4</sub>]MeOH, 500 MHz):  $\delta$  7.09 (s, 8H, Ar-H),  $\delta$  6.17 (s, 4H, Ar-H),  $\delta$  2.38 (s, 12H, CH<sub>3</sub>),  $\delta$  1.97 (s, 24H, CH<sub>3</sub>),  $\delta$  0.60 (s, 6H, BH<sub>3</sub>). <sup>13</sup>C NMR ([*d*<sub>4</sub>]MeOH, 125 MHz):  $\delta$

176.7 (q, broad, H<sub>3</sub>B-C), 151.5, 140.4, 136.8, 133.5, 130.2, 127.1, 92.3, 21.2, 17.6 ppm. <sup>11</sup>B NMR ([d<sub>4</sub>]MeOH, 128 MHz): δ 14, -36 ppm. HR-ESI-MS: m/z calc. for C<sub>50</sub>H<sub>54</sub>B<sub>3</sub>N<sub>4</sub>O<sub>4</sub> [[4]<sup>-</sup>]: 807.4452; Found: 807.4443.

### Synthesis of di-Rh(COD)Cl complex K[5]

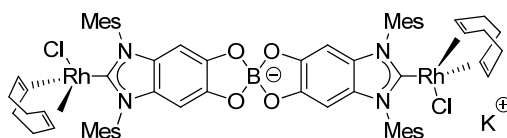

Cyclooctadiene rhodium chloride dimer (60 mg, 0.13 mmol) was dissolved in 5 mL of toluene, and was slowly added in to the *in situ* generated anionic bis-NHC from [2][Br] (100 mg, 0.12 mmol) and KO<sup>t</sup>Bu (28 mg, 0.24 mmol) in THF (10 mL). The resulting mixture was refluxed overnight to result in precipitations. The product was collected by filtration, and washed with small portion of THF and diethyl ether (126 mg, yield 79 %). <sup>1</sup>H NMR ([d<sub>6</sub>]DMSO, 800 MHz): δ 7.14 (s, 4H, Ar-H), δ 7.12 (s, 4H, Ar-H), δ 5.94 (s, 4H, Ar-H), δ 4.29 (m, 4H, COD-CH), δ 3.37 (m, 4H, COD-CH), δ 2.38 (s, 12H, CH<sub>3</sub>), δ 2.19 (s, 12H, CH<sub>3</sub>), δ 1.93 (s, 12H, CH<sub>3</sub>), δ 1.74 (m, 8H, COD-CH<sub>2</sub>), δ 1.51 (m, 8H, COD-CH<sub>2</sub>). <sup>13</sup>C NMR ([d<sub>6</sub>]DMSO, 125 MHz): δ 186.0 (<sup>1</sup>J<sub>Rh-C</sub>=52 Hz), 149.4, 138.0, 137.4, 135.0, 133.5, 129.3, 128.3, 127.4, 94.7, 89.7, 66.9, 32.3, 27.9, 20.8, 19.1, 17.5. <sup>11</sup>B NMR ([d<sub>6</sub>]DMSO, 128 MHz): δ 14 ppm. HR-ESI-MS: m/z calc. for C<sub>66</sub>H<sub>72</sub>BCl<sub>2</sub>N<sub>4</sub>O<sub>4</sub>Rh<sub>2</sub> [[5]<sup>-</sup>]: 1271.3150; Found: 1271.3134.

### Synthesis of di-Rh(CO)<sub>2</sub>Cl complex K[6]

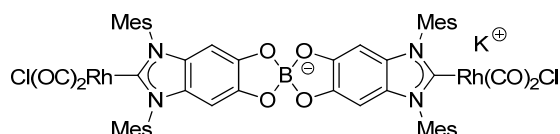

The CO gas was bubbled through a 10 mL of THF solution of K[5] (27 mg, 0.02 mmol) at ambient temperature for 30 minutes. After reaction, diethyl ether was added into the solution to result in precipitation of complex K[6] as yellowish solid, which was collected by filtration (19 mg, yield 76 %). <sup>1</sup>H NMR ([d<sub>6</sub>]DMSO, 400 MHz): δ 7.12, 7.114, 6.00, 5.97, 5.96, 2.37, 2.05, 2.04 ppm. <sup>13</sup>C NMR ([d<sub>6</sub>]DMSO, 200 MHz): δ 184.2, 138.8, 178.1, 177.8, 149.9, 149.5, 138.3, 135.8, 135.0, 133.2, 129.6, 129.0, 128.9, 128.6, 128.2, 127.1, 125.3, 124.2, 90.0, 21.0, 20.8, 17.9, 16.7, 15.4 ppm. HR-ESI-MS: m/z calc. for C<sub>54</sub>H<sub>48</sub>BCl<sub>2</sub>N<sub>4</sub>O<sub>8</sub>Rh<sub>2</sub> [[6]<sup>-</sup>]: 1167.1067; Found: 1167.1076. calc. for C<sub>53</sub>H<sub>48</sub>BCl<sub>2</sub>N<sub>4</sub>O<sub>7</sub>Rh<sub>2</sub> [[6]<sup>-</sup>-CO]: 1139.1117; Found: 1139.1142. FT-IR: 2073, 1992 cm<sup>-1</sup>( $\bar{\nu}_{\text{CO}}$ )

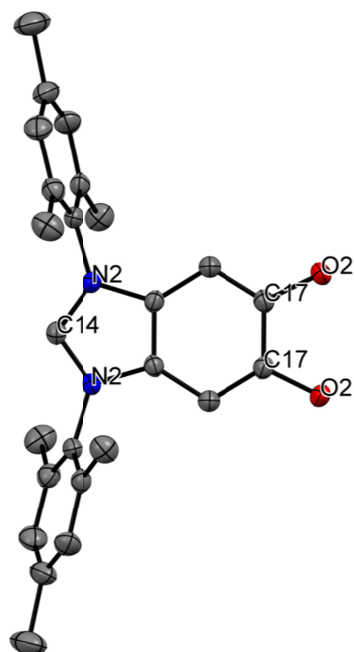

**Figure S1** Molecular structure of  $[1]^+$ . Hydrogen atoms and counter anion are omitted for clarity. Selected bond distance ( $\text{\AA}$ ) and bond angle (deg): C14-N2 1.338(3), C17-O2 1.351(3), N2-C14-N2 108.9(3).

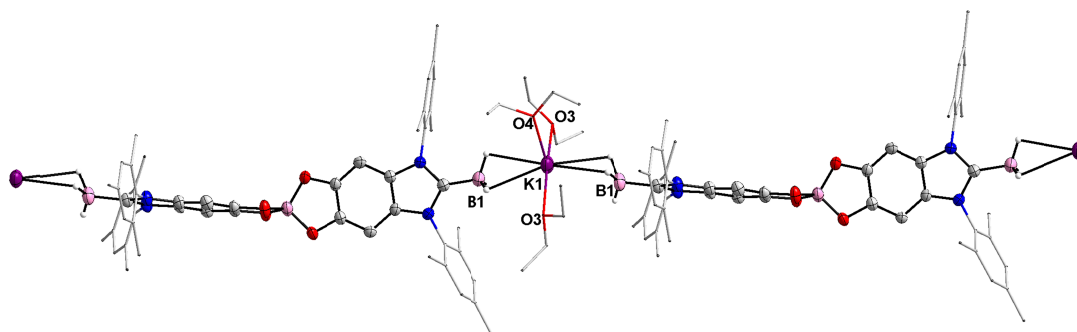

**Figure S2** Polymeric structure of  $K[4]$  in solid state formed via potassium-hydrogen interactions. Each potassium atom is coordinated by three disordered diethyl ether molecules.

### Study on the condensation process

The experiments are designed to identify how many boron atoms were provided by a BDBA (benzeneboronic acid) molecule. As shown in the table below, the experiments were carried out with different molar ratio of [1][Br] and BDBA. After reaction, all volatile species were removed under vacuum. The crude reaction mixtures were subjected to  $^1\text{H}$  NMR measurement without purification. The isolation yield was obtained after recrystallization.

| Molar ratio<br>[1][Br] : BDBA | Isolation yield<br>(based on [1][Br]) |
|-------------------------------|---------------------------------------|
| 1:1                           | 94%                                   |
| 2:1                           | 80%                                   |
| 4:1                           | 87%                                   |

**Table S1** Isolation yield of [2][Br] with different molar ratio of reactants.

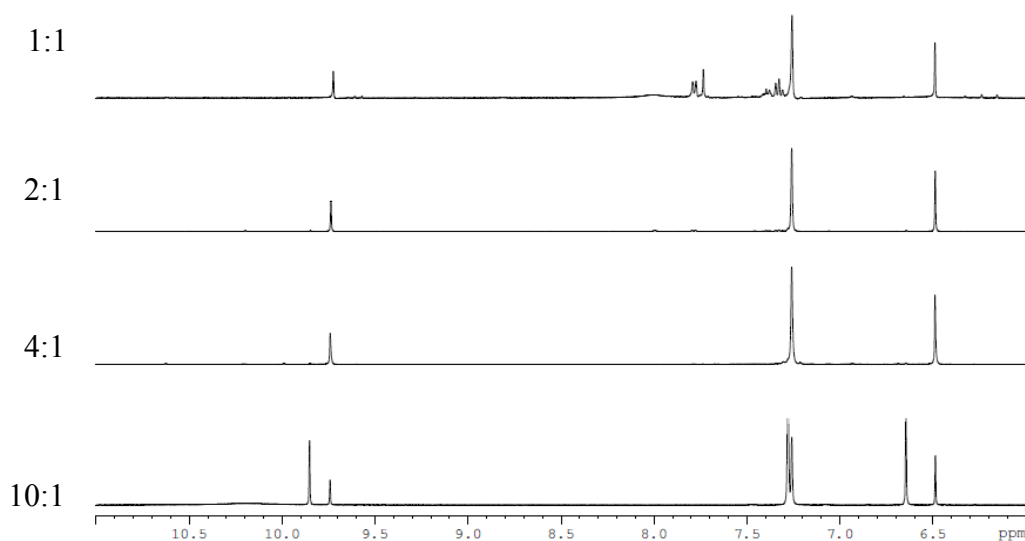

**Figure S3** Crude  $^1\text{H}$  NMR of the reaction mixtures.



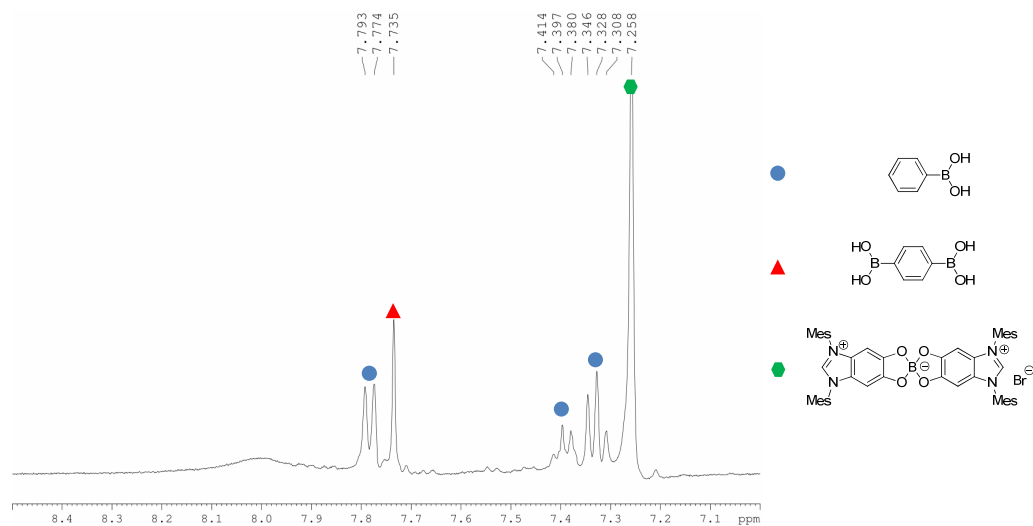

**Figure S4** Crude <sup>1</sup>H NMR of the reaction mixture having 1:1 molar ratio of [1][Br] and BDBA.

**Table S2** Crystal data and structure refinement for [1][Br].

|                                   |                                                                                                       |
|-----------------------------------|-------------------------------------------------------------------------------------------------------|
| Identification code               | ic15773                                                                                               |
| Empirical formula                 | C <sub>25</sub> H <sub>29</sub> Br N <sub>2</sub> O <sub>3</sub>                                      |
| Formula weight                    | 485.41                                                                                                |
| Temperature                       | 150(2) K                                                                                              |
| Wavelength                        | 0.71073 Å                                                                                             |
| Crystal system                    | Orthorhombic                                                                                          |
| Space group                       | Pccn                                                                                                  |
| Unit cell dimensions              | a = 18.7580(18) Å      α = 90°.<br>b = 15.0409(14) Å      β = 90°.<br>c = 17.1991(16) Å      γ = 90°. |
| Volume                            | 4852.5(8) Å <sup>3</sup>                                                                              |
| Z                                 | 8                                                                                                     |
| Density (calculated)              | 1.329 g/cm <sup>3</sup>                                                                               |
| Absorption coefficient            | 1.722 mm <sup>-1</sup>                                                                                |
| F(000)                            | 2016                                                                                                  |
| Crystal size                      | 0.47 x 0.45 x 0.08 mm <sup>3</sup>                                                                    |
| Theta range for data collection   | 1.74 to 27.50°.                                                                                       |
| Index ranges                      | -24 ≤ h ≤ 23, -19 ≤ k ≤ 19, -22 ≤ l ≤ 22                                                              |
| Reflections collected             | 35835                                                                                                 |
| Independent reflections           | 5580 [R(int) = 0.0721]                                                                                |
| Completeness to theta = 27.50°    | 100.0 %                                                                                               |
| Absorption correction             | Semi-empirical from equivalents                                                                       |
| Max. and min. transmission        | 0.8746 and 0.4984                                                                                     |
| Refinement method                 | Full-matrix least-squares on F <sup>2</sup>                                                           |
| Data / restraints / parameters    | 5580 / 0 / 287                                                                                        |
| Goodness-of-fit on F <sup>2</sup> | 1.028                                                                                                 |
| Final R indices [I > 2σ(I)]       | R1 = 0.0450, wR2 = 0.1093                                                                             |
| R indices (all data)              | R1 = 0.0698, wR2 = 0.1237                                                                             |
| Largest diff. peak and hole       | 0.535 and -0.495 e.Å <sup>-3</sup>                                                                    |

**Table S3** Crystal data and structure refinement for [2][Br].

|                                   |                                                                                                           |
|-----------------------------------|-----------------------------------------------------------------------------------------------------------|
| Identification code               | ic15764                                                                                                   |
| Empirical formula                 | C <sub>54</sub> H <sub>58.78</sub> B Br N <sub>4</sub> O <sub>5.61</sub>                                  |
| Formula weight                    | 944.35                                                                                                    |
| Temperature                       | 150(2) K                                                                                                  |
| Wavelength                        | 0.71073 Å                                                                                                 |
| Crystal system                    | Monoclinic                                                                                                |
| Space group                       | P2(1)/n                                                                                                   |
| Unit cell dimensions              | a = 8.8956(2) Å      α = 90°.<br>b = 17.9979(4) Å      β = 90.3726(9)°.<br>c = 30.9329(7) Å      γ = 90°. |
| Volume                            | 4952.32(19) Å <sup>3</sup>                                                                                |
| Z                                 | 4                                                                                                         |
| Density (calculated)              | 1.267 g/cm <sup>3</sup>                                                                                   |
| Absorption coefficient            | 0.882 mm <sup>-1</sup>                                                                                    |
| F(000)                            | 1983                                                                                                      |
| Crystal size                      | 0.45 x 0.20 x 0.16 mm <sup>3</sup>                                                                        |
| Theta range for data collection   | 1.31 to 25.00°.                                                                                           |
| Index ranges                      | -10 ≤ h ≤ 9, -21 ≤ k ≤ 21, -36 ≤ l ≤ 36                                                                   |
| Reflections collected             | 27631                                                                                                     |
| Independent reflections           | 8707 [R(int) = 0.0518]                                                                                    |
| Completeness to theta = 25.00°    | 99.7 %                                                                                                    |
| Absorption correction             | Semi-empirical from equivalents                                                                           |
| Max. and min. transmission        | 0.873 and 0.739                                                                                           |
| Refinement method                 | Full-matrix least-squares on F <sup>2</sup>                                                               |
| Data / restraints / parameters    | 8707 / 7 / 586                                                                                            |
| Goodness-of-fit on F <sup>2</sup> | 1.063                                                                                                     |
| Final R indices [I > 2σ(I)]       | R1 = 0.0645, wR2 = 0.1788                                                                                 |
| R indices (all data)              | R1 = 0.0944, wR2 = 0.1956                                                                                 |
| Largest diff. peak and hole       | 0.800 and -1.079 e.Å <sup>-3</sup>                                                                        |

**Table S4** Crystal data and structure refinement for K[4].

|                                   |                                                                                                                                    |
|-----------------------------------|------------------------------------------------------------------------------------------------------------------------------------|
| Identification code               | ic16249                                                                                                                            |
| Empirical formula                 | C64.64 H80.55 B3 K N4 O8.64                                                                                                        |
| Formula weight                    | 1111.25                                                                                                                            |
| Temperature                       | 150(2) K                                                                                                                           |
| Wavelength                        | 0.71073 Å                                                                                                                          |
| Crystal system                    | Monoclinic                                                                                                                         |
| Space group                       | C2/c                                                                                                                               |
| Unit cell dimensions              | a = 22.2188(4) Å $\alpha = 90^\circ$ .<br>b = 19.7828(4) Å $\beta = 117.3330(9)^\circ$ .<br>c = 16.8614(3) Å $\gamma = 90^\circ$ . |
| Volume                            | 6584.0(2) Å <sup>3</sup>                                                                                                           |
| Z                                 | 4                                                                                                                                  |
| Density (calculated)              | 1.121 Mg/m <sup>3</sup>                                                                                                            |
| Absorption coefficient            | 0.134 mm <sup>-1</sup>                                                                                                             |
| F(000)                            | 2374                                                                                                                               |
| Crystal size                      | 0.40 x 0.22 x 0.20 mm <sup>3</sup>                                                                                                 |
| Theta range for data collection   | 1.46 to 27.50°.                                                                                                                    |
| Index ranges                      | -28 ≤ h ≤ 28, -25 ≤ k ≤ 25, -21 ≤ l ≤ 21                                                                                           |
| Reflections collected             | 25445                                                                                                                              |
| Independent reflections           | 7542 [R(int) = 0.0423]                                                                                                             |
| Completeness to theta = 27.50°    | 99.6 %                                                                                                                             |
| Absorption correction             | Semi-empirical from equivalents                                                                                                    |
| Max. and min. transmission        | 0.976 and 0.884                                                                                                                    |
| Refinement method                 | Full-matrix least-squares on F <sup>2</sup>                                                                                        |
| Data / restraints / parameters    | 7542 / 40 / 397                                                                                                                    |
| Goodness-of-fit on F <sup>2</sup> | 1.045                                                                                                                              |
| Final R indices [I > 2σ(I)]       | R1 = 0.0811, wR2 = 0.2483                                                                                                          |
| R indices (all data)              | R1 = 0.1245, wR2 = 0.2823                                                                                                          |
| Largest diff. peak and hole       | 0.987 and -0.500 e.Å <sup>-3</sup>                                                                                                 |

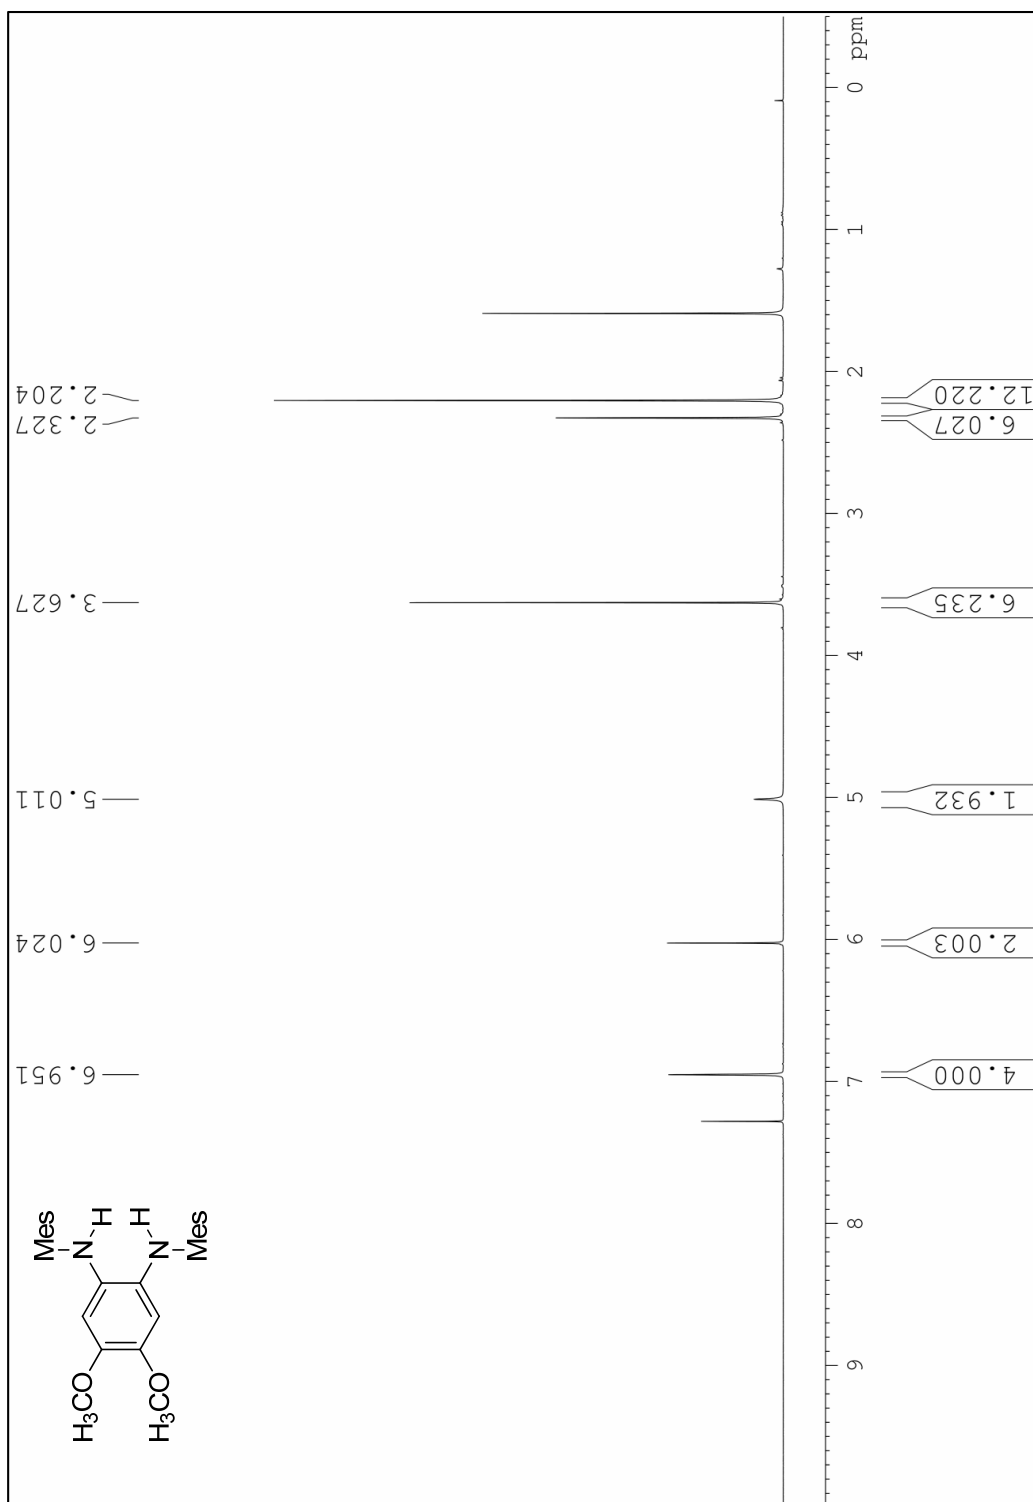

<sup>1</sup>H NMR of 4,5-dimethoxy-N,N'-dimesityl-1,2-benzenediamine in CDCl<sub>3</sub>

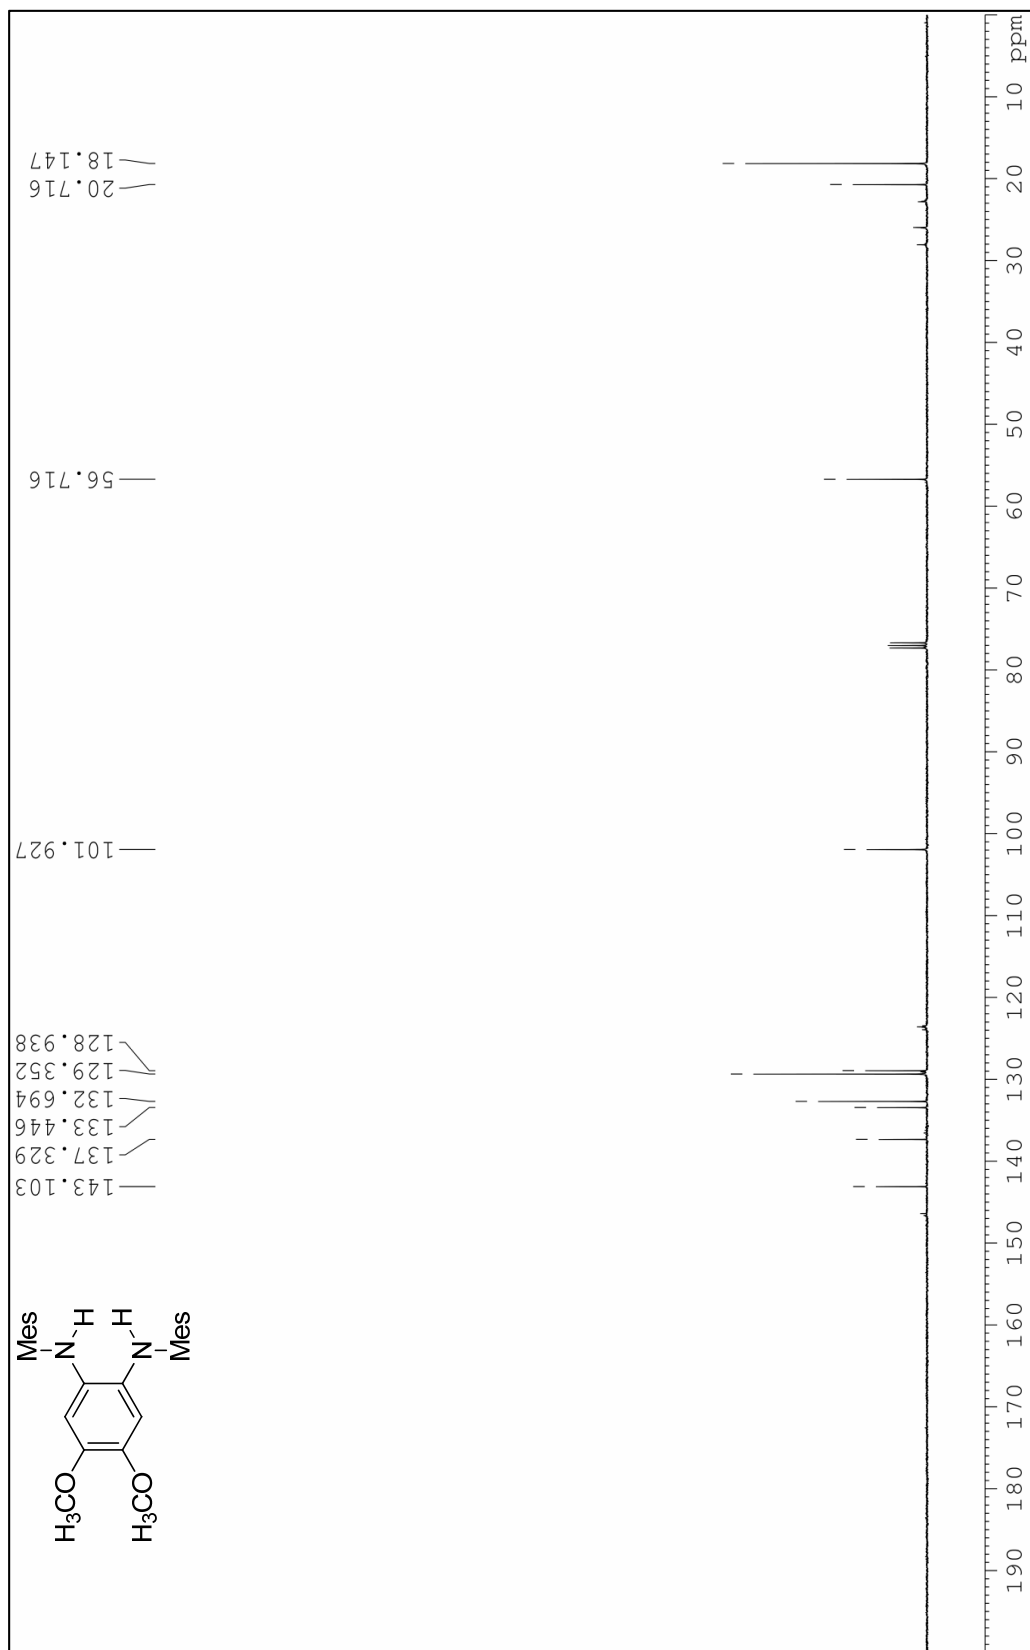

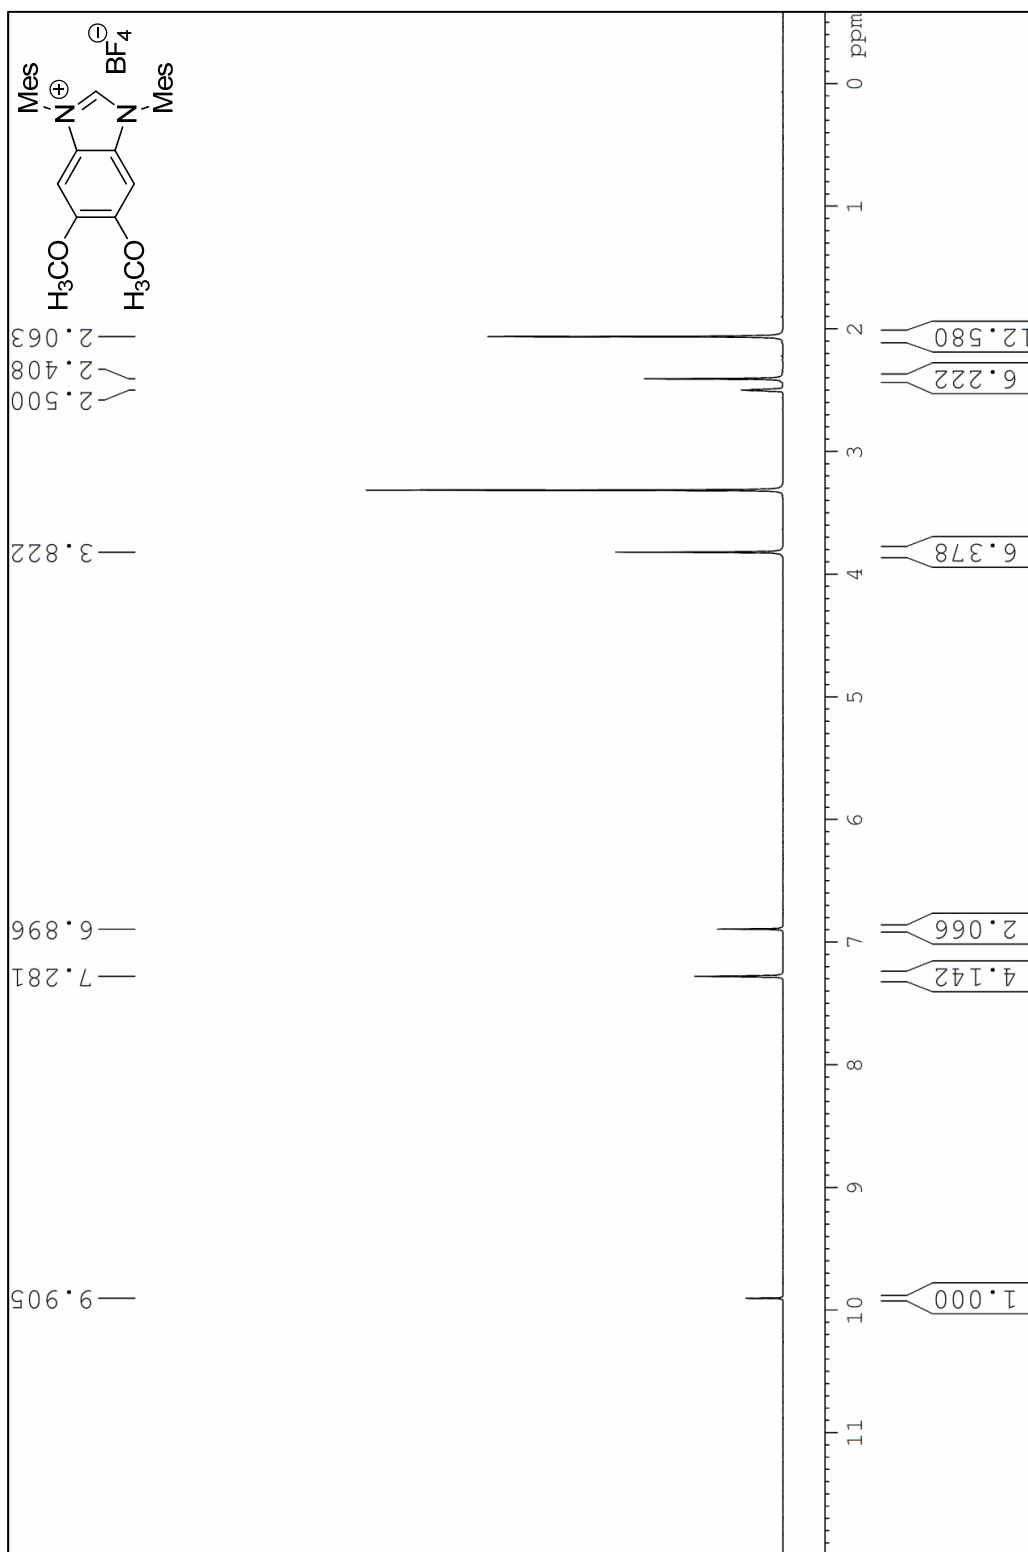

<sup>1</sup>H NMR of 5,6-dimethoxy-1,3-dimesitylbenzimidazolium tetrafluoroborate in [d<sub>6</sub>]DMSO

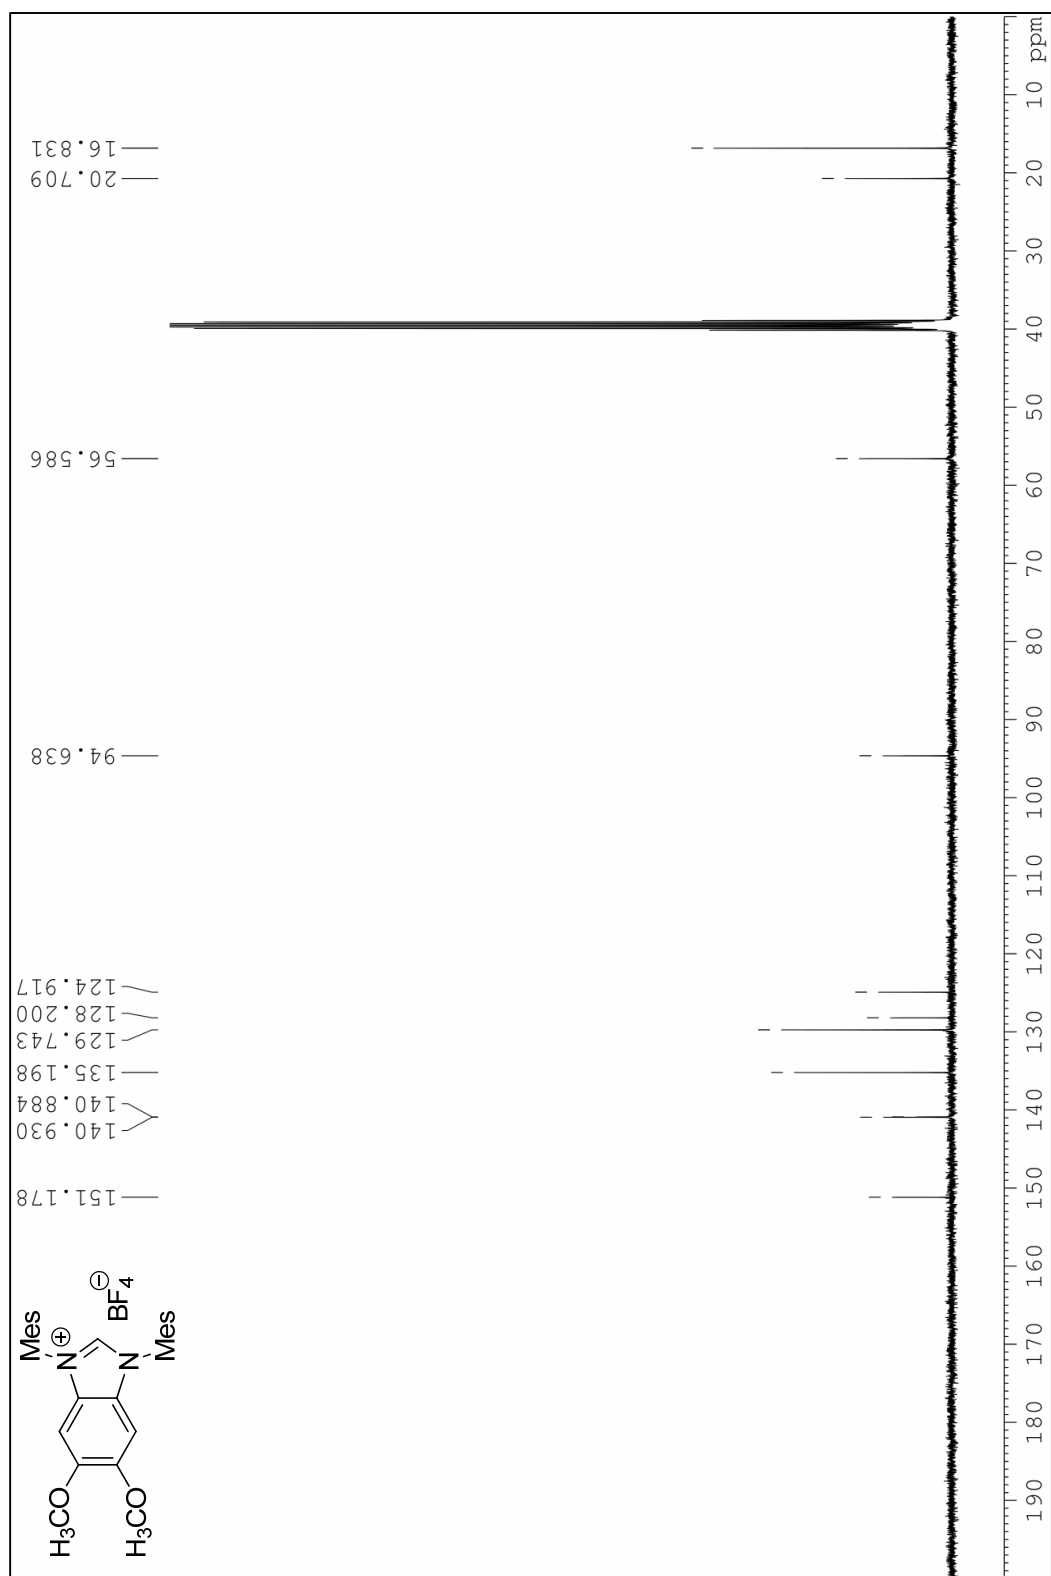

$^{13}\text{C}$  NMR of 5,6-dimethoxy-1,3-dimesitylbenzimidazolium tetrafluoroborate in  $[\text{d}_6]\text{DMSO}$



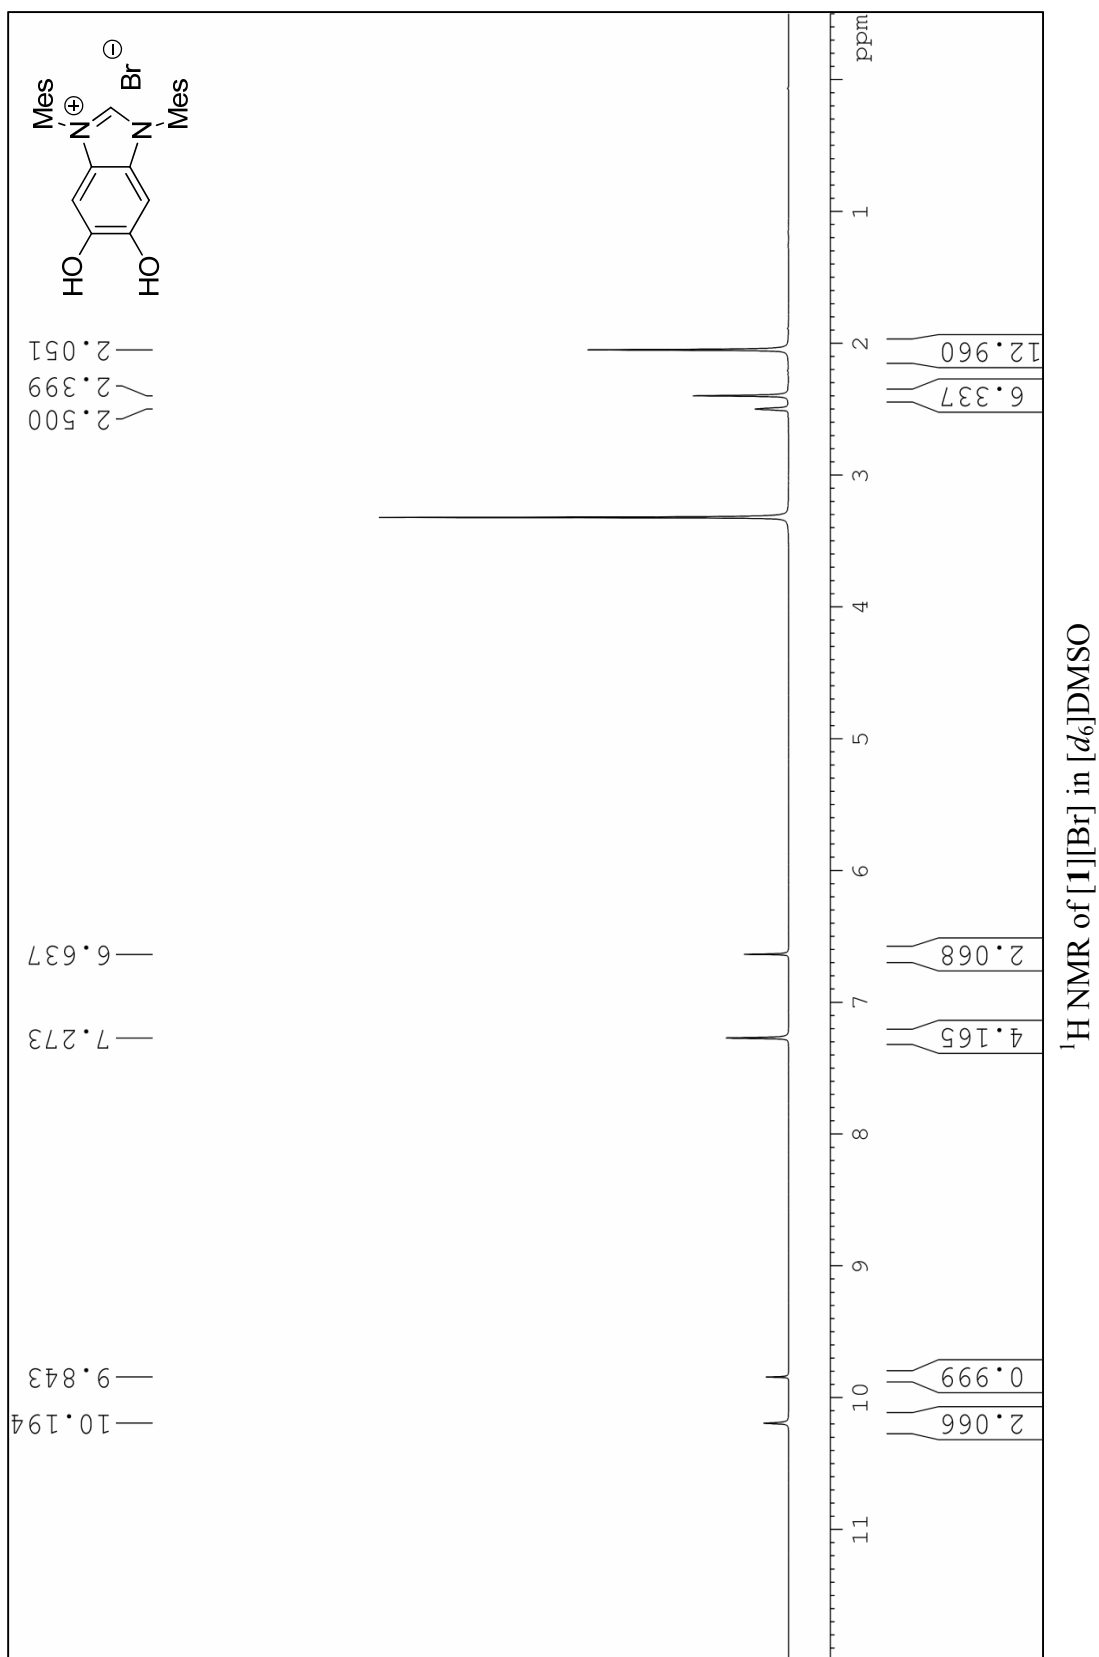

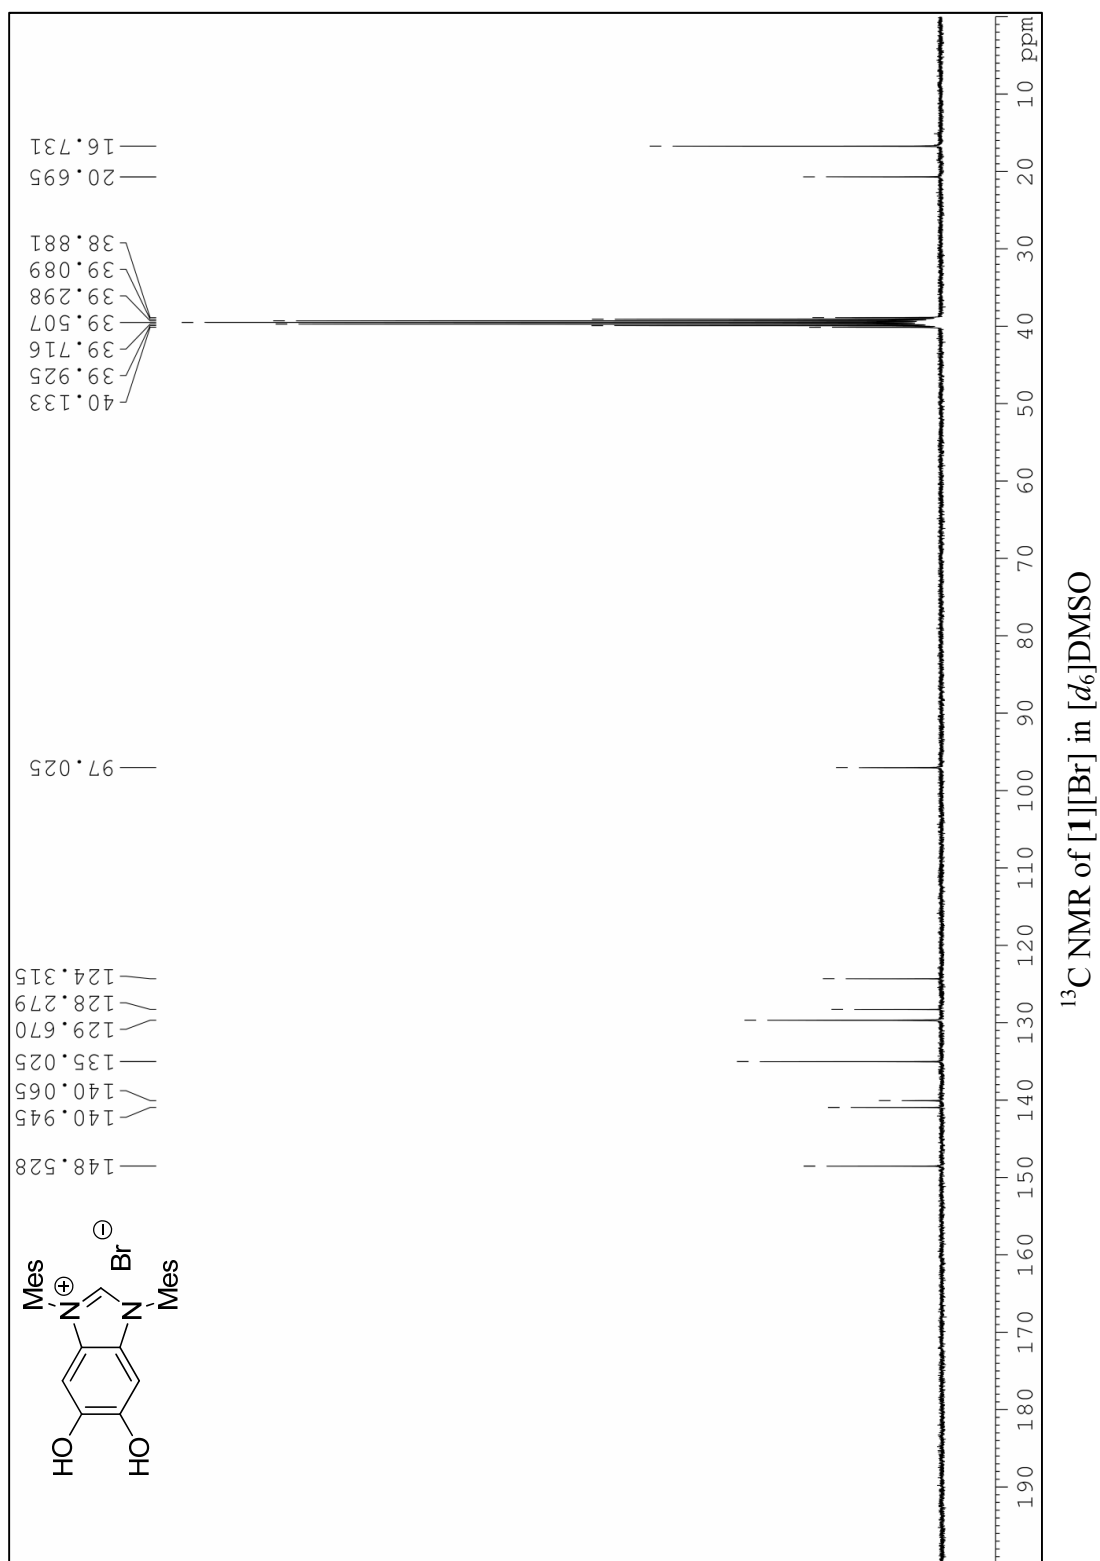



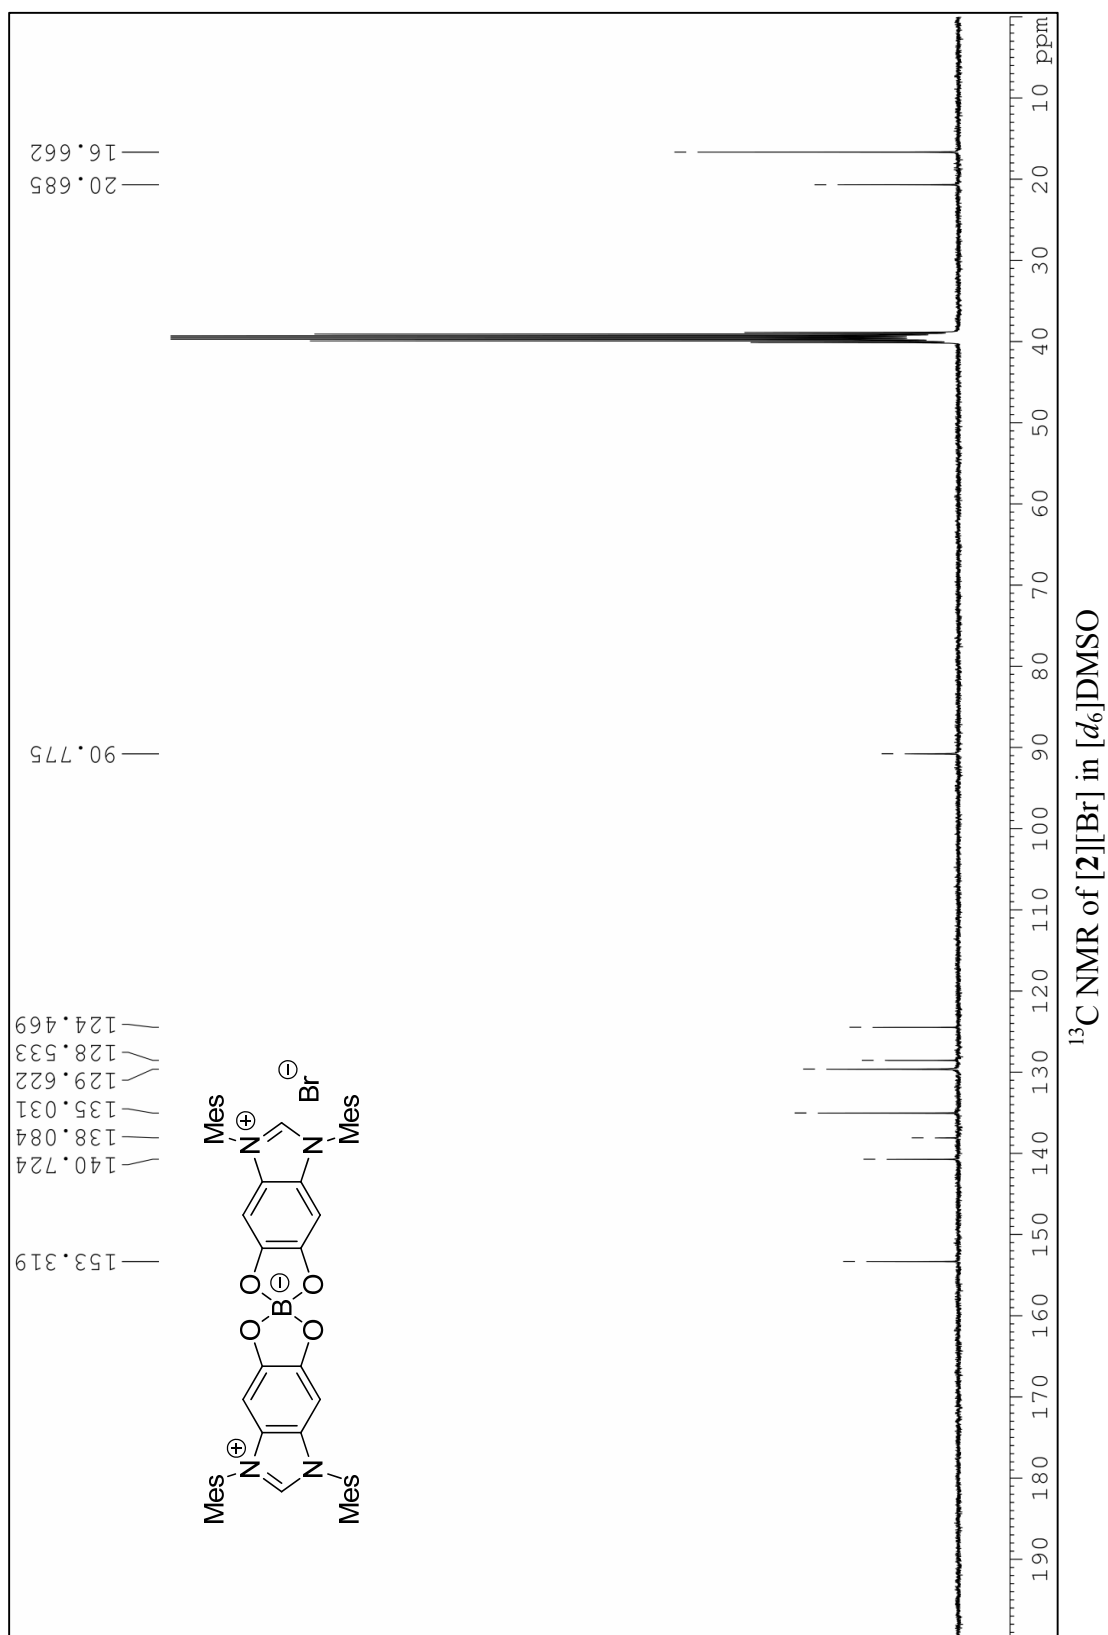

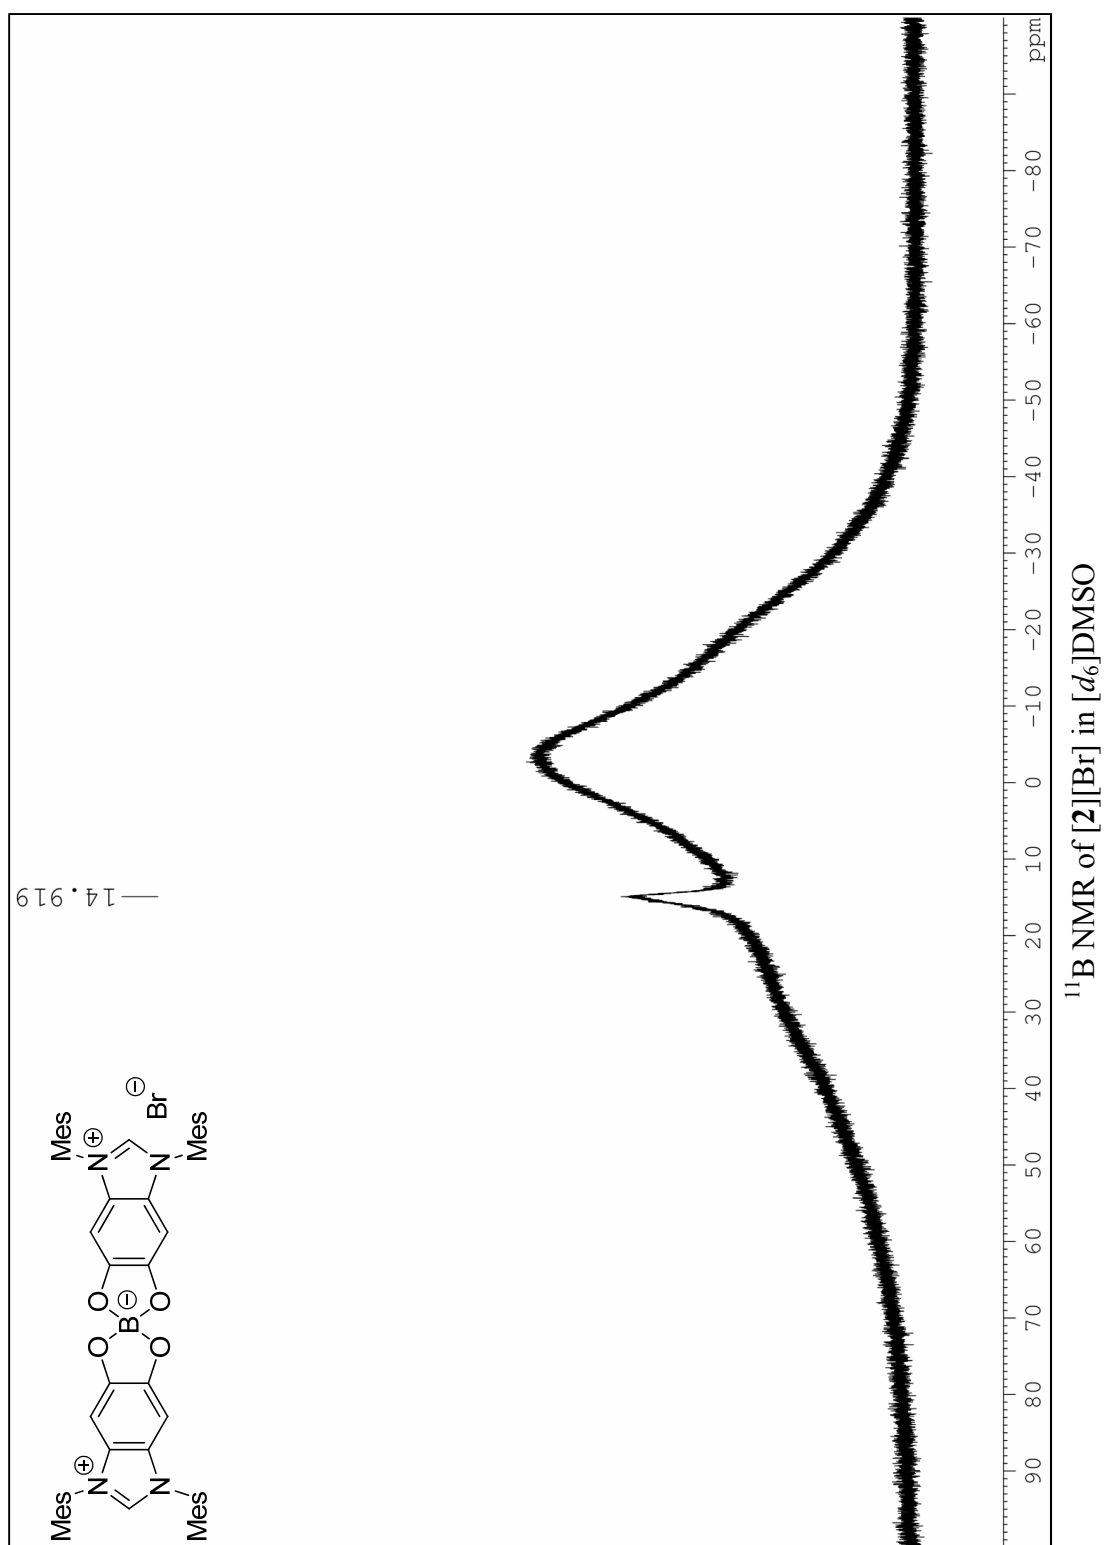

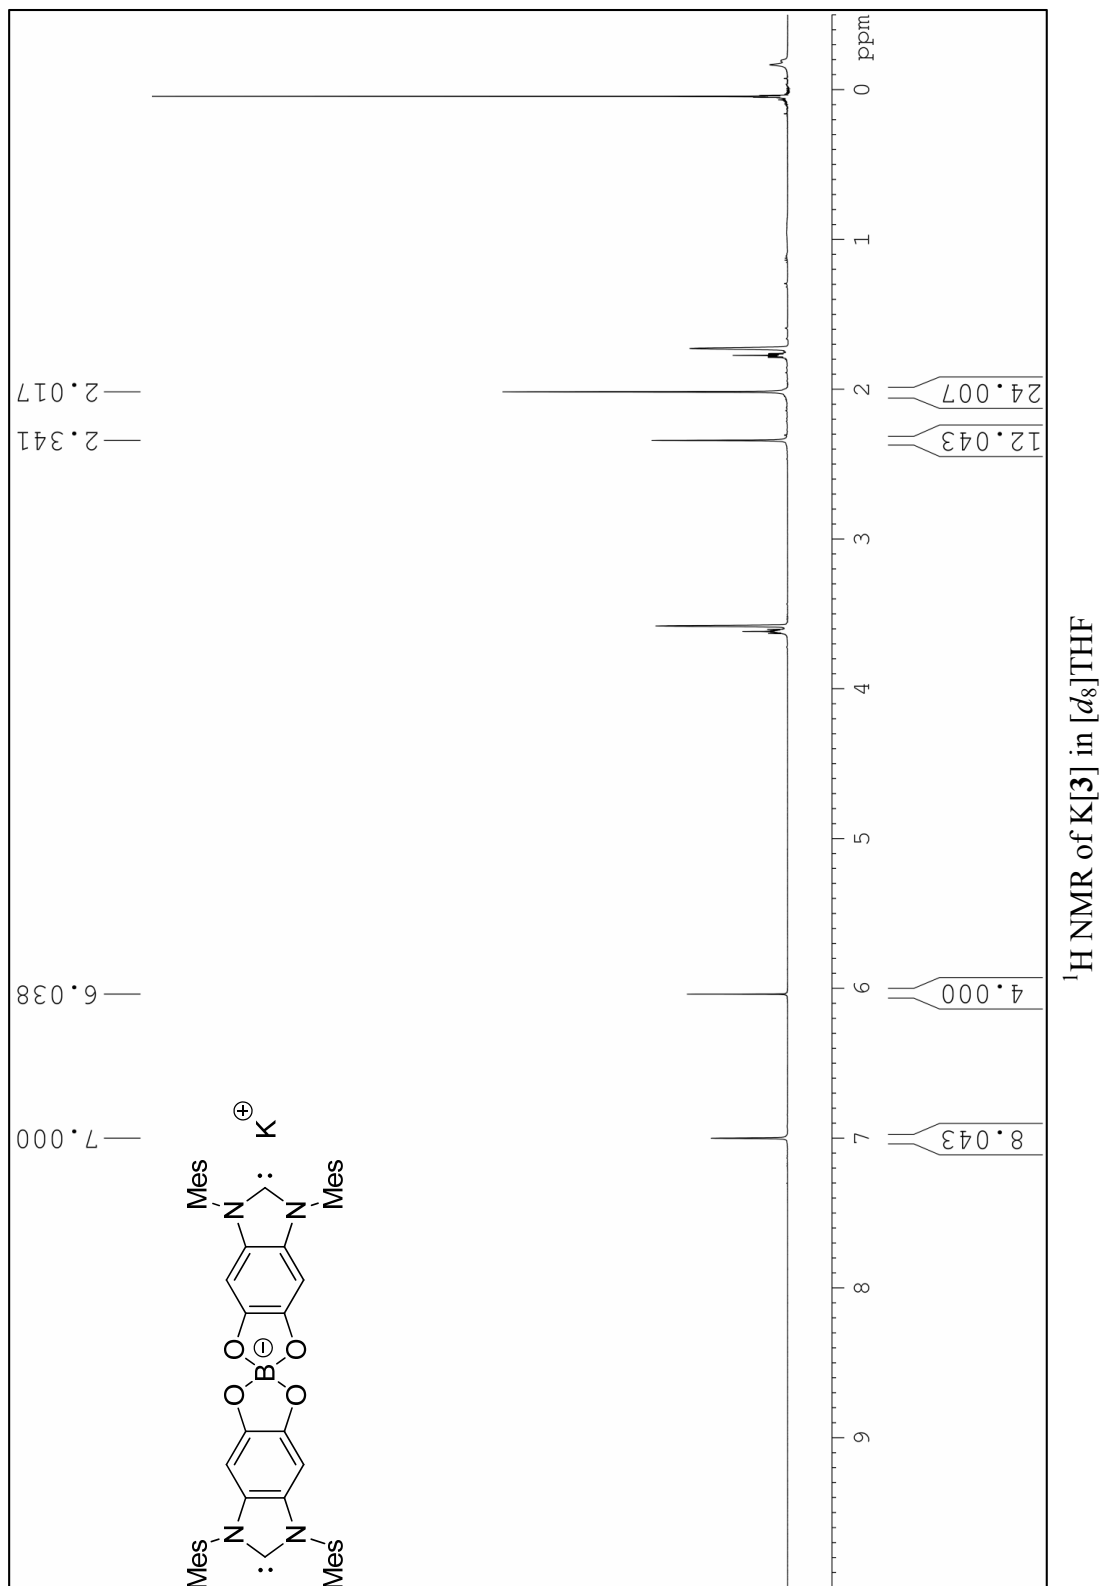

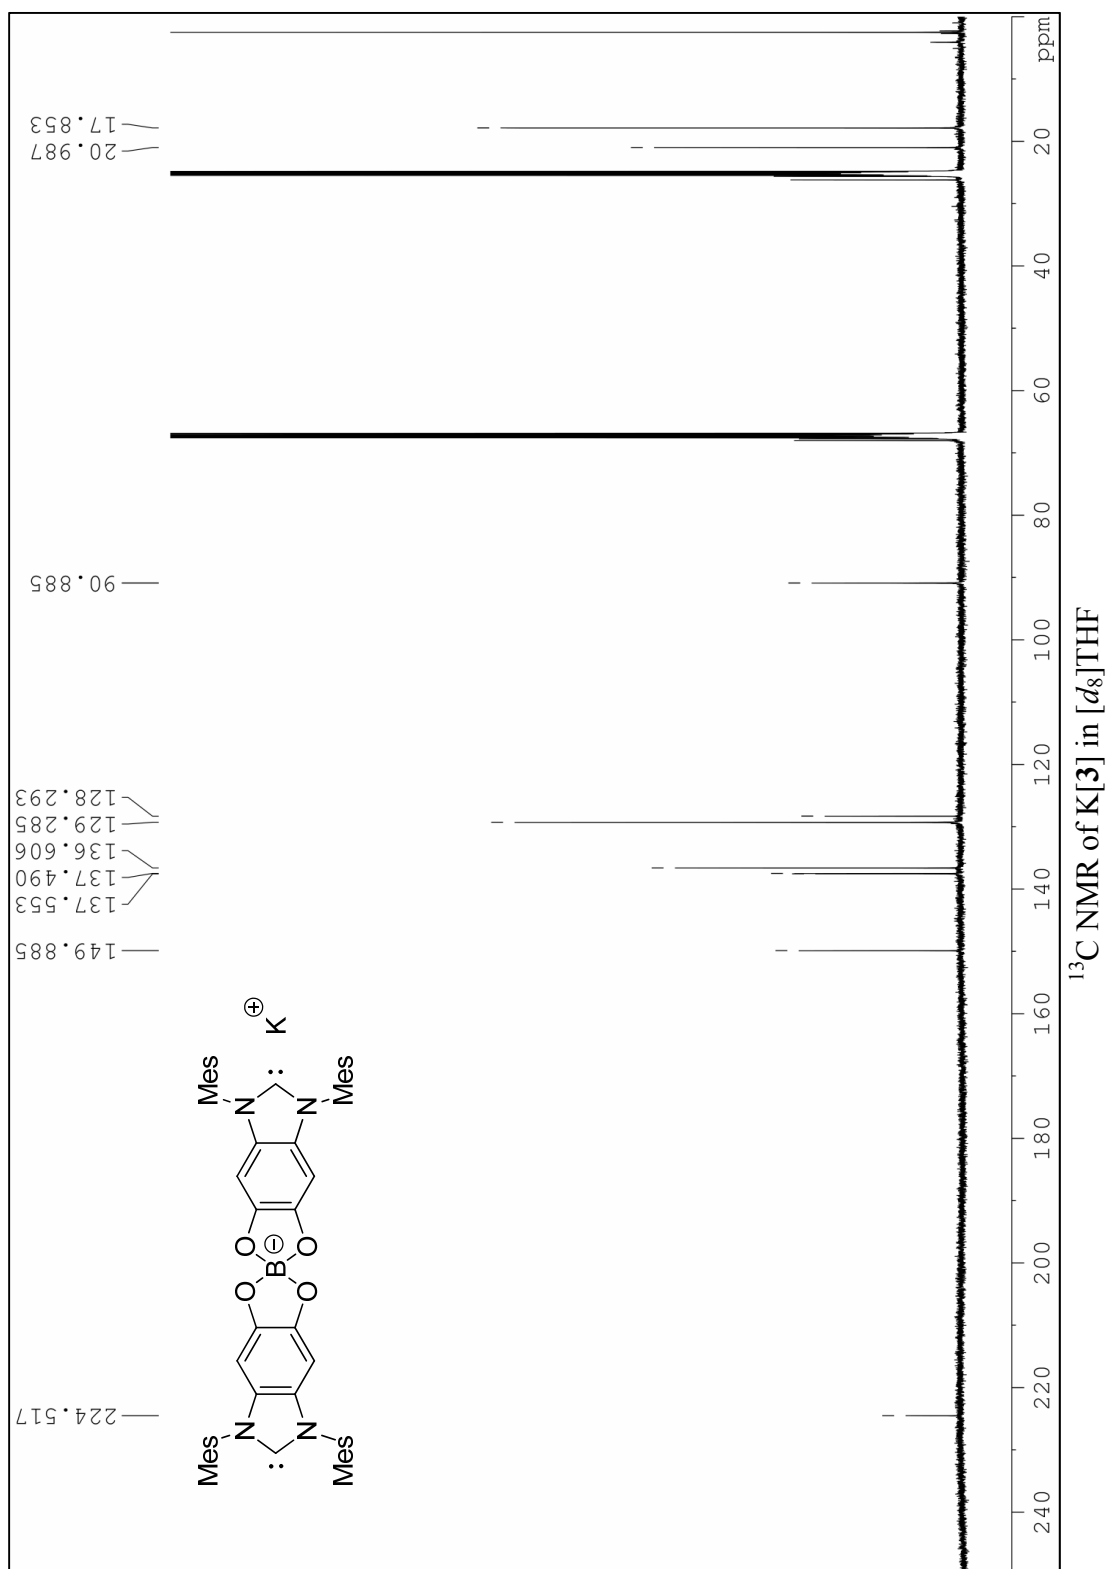

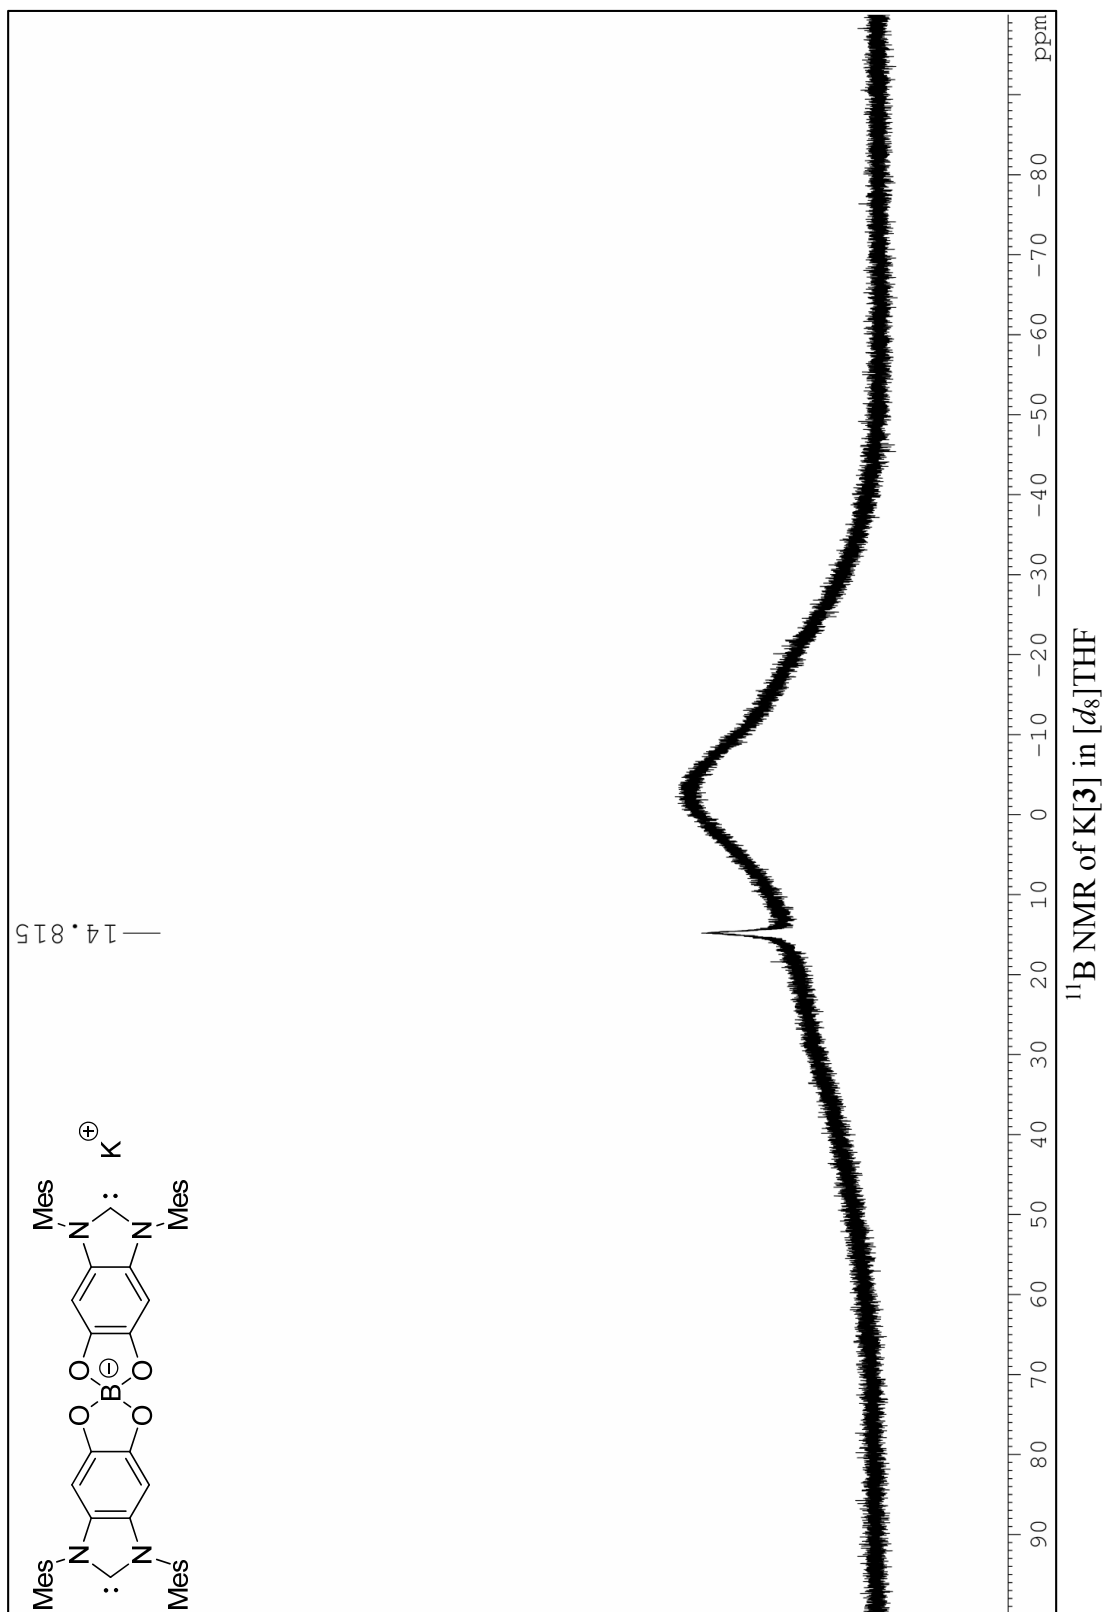



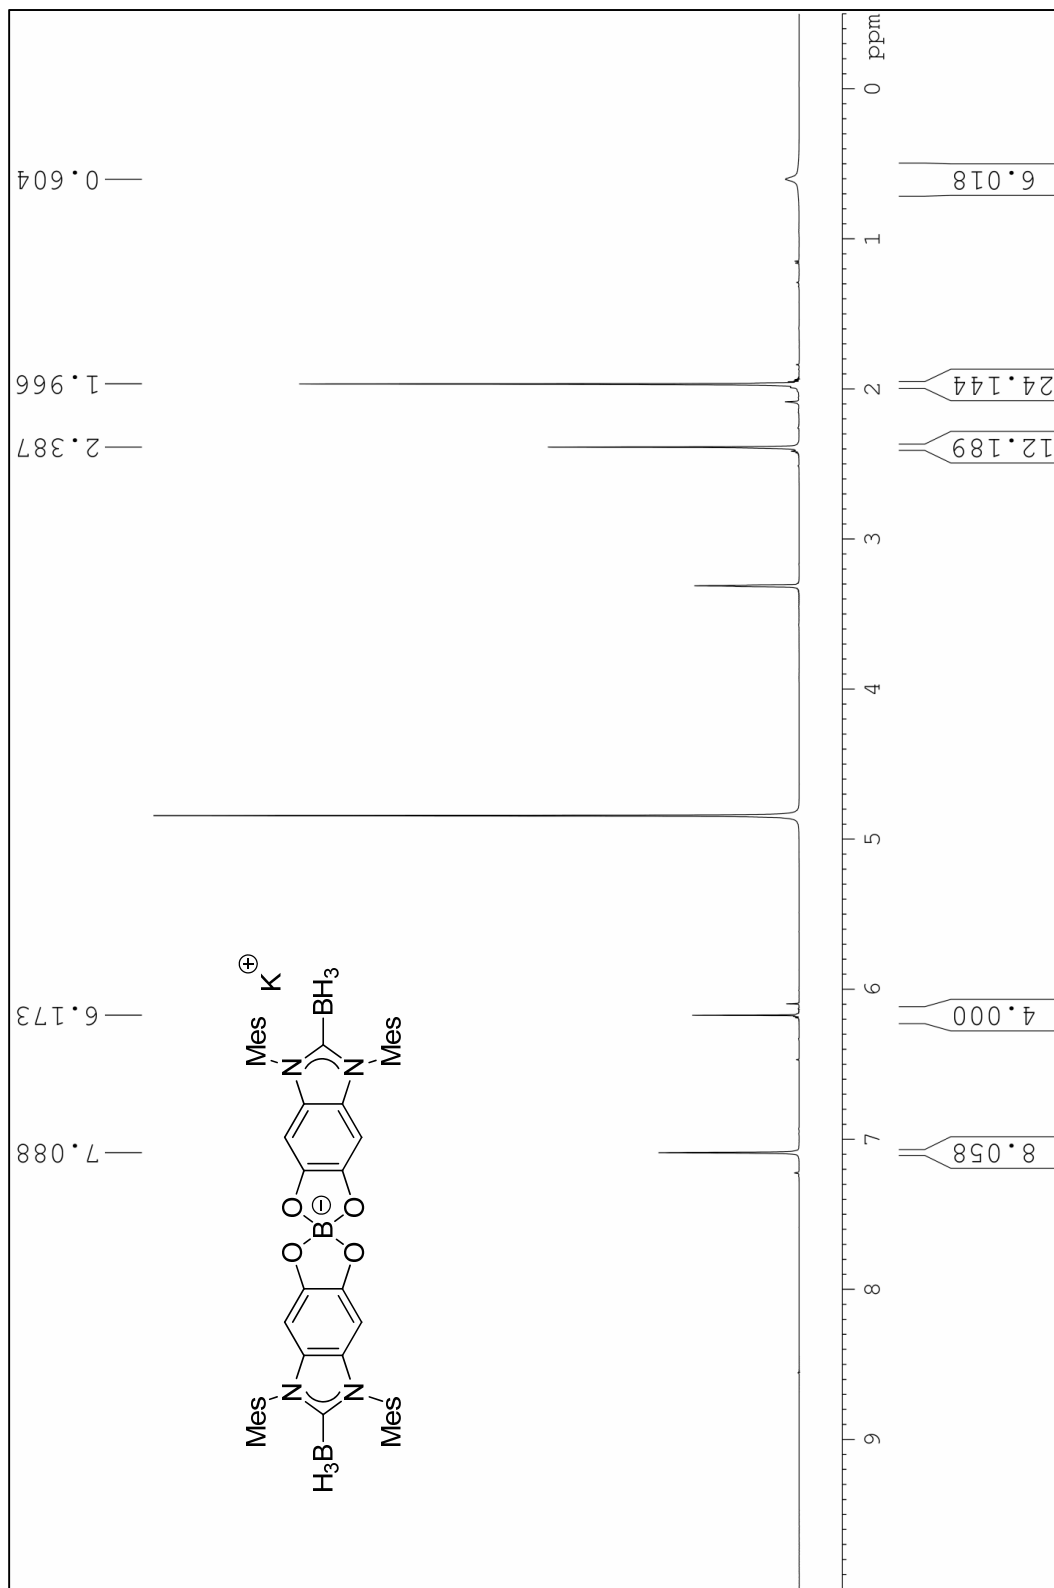

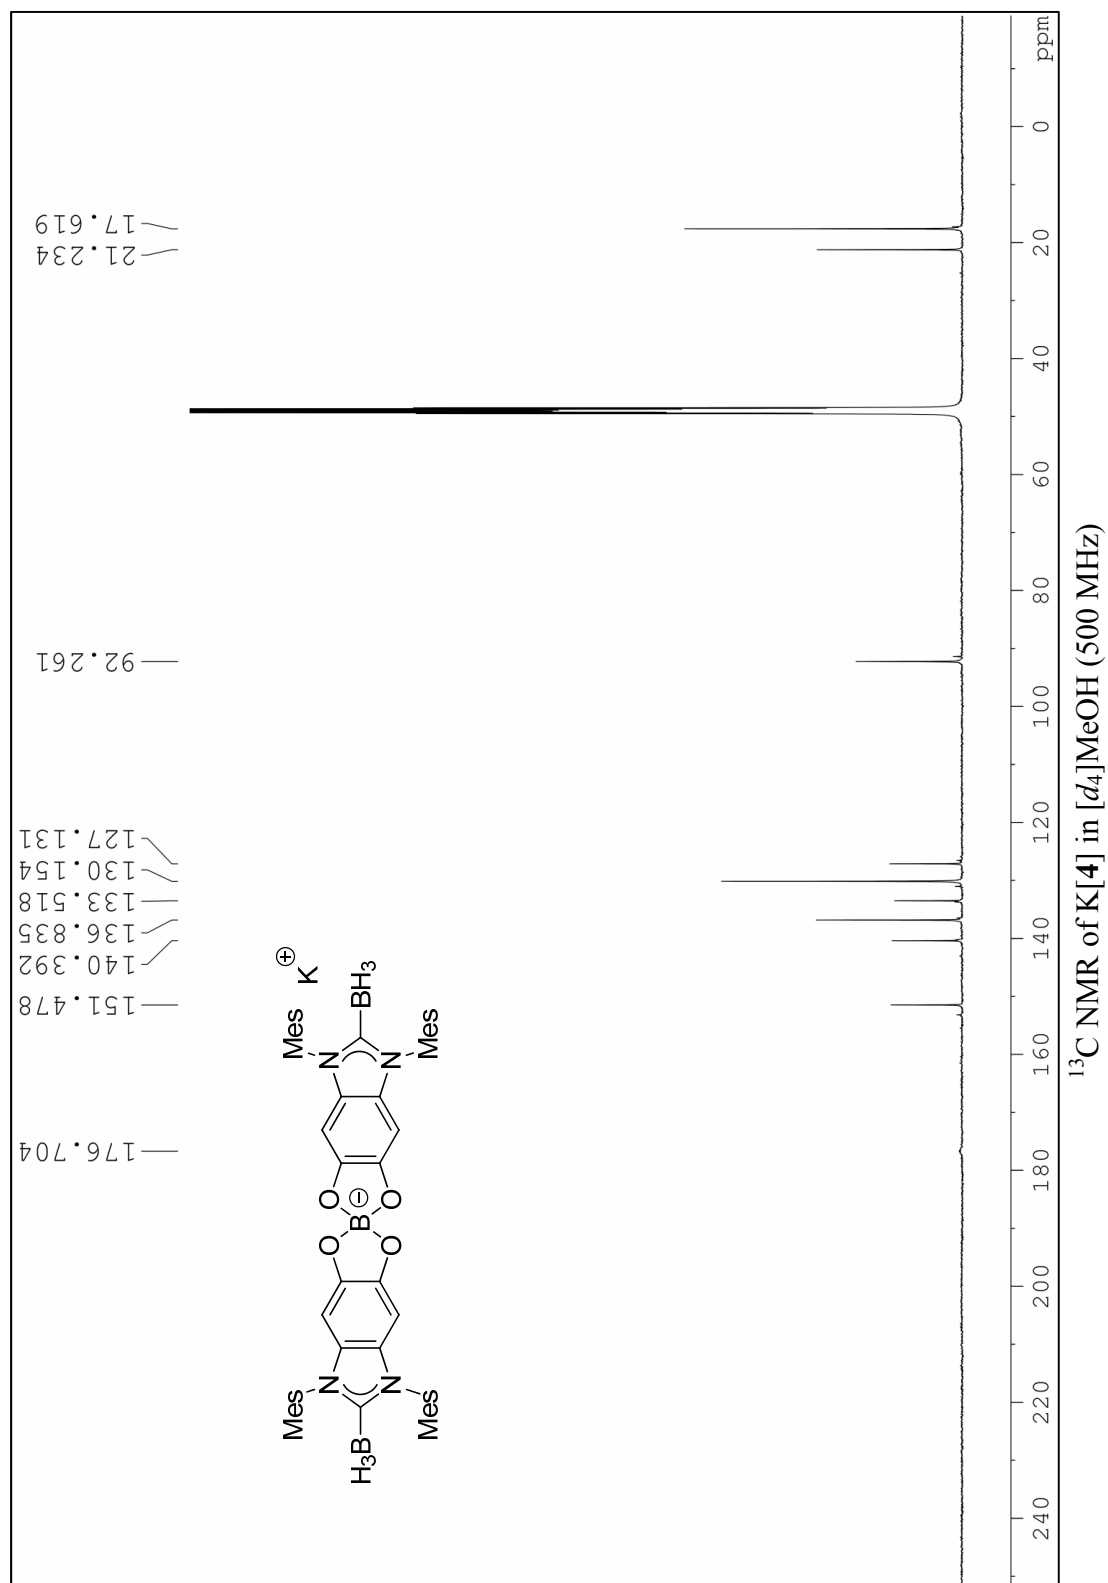

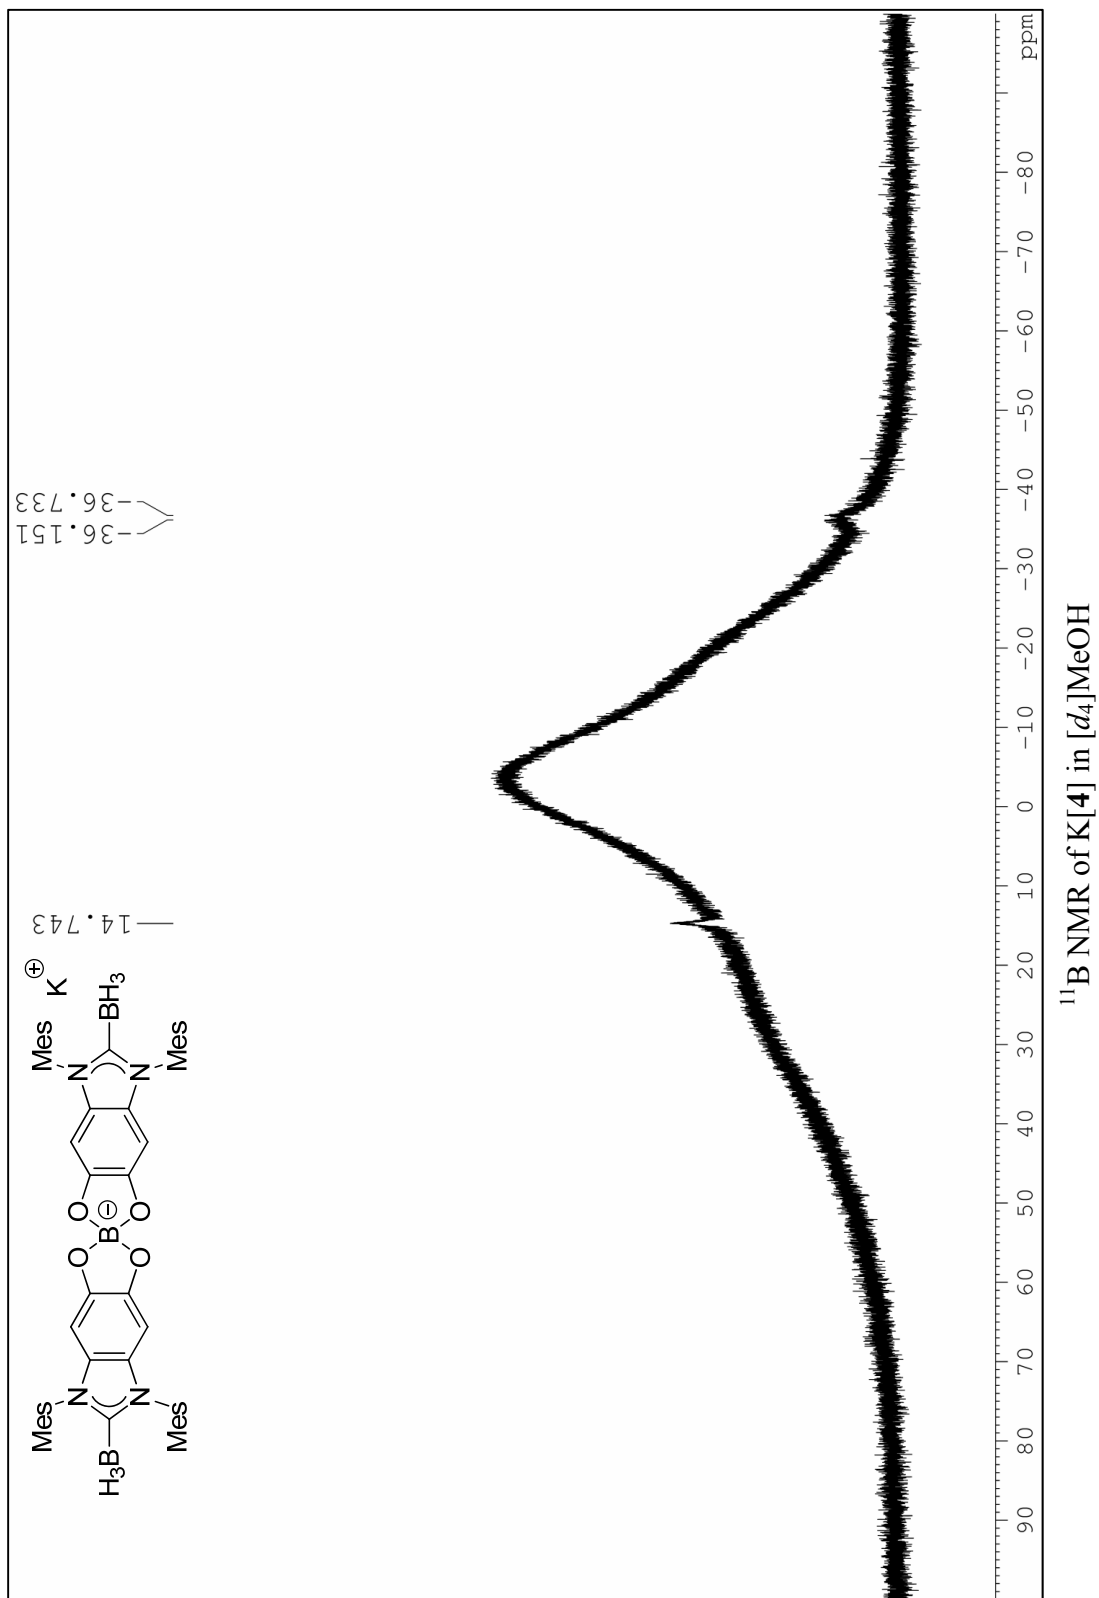

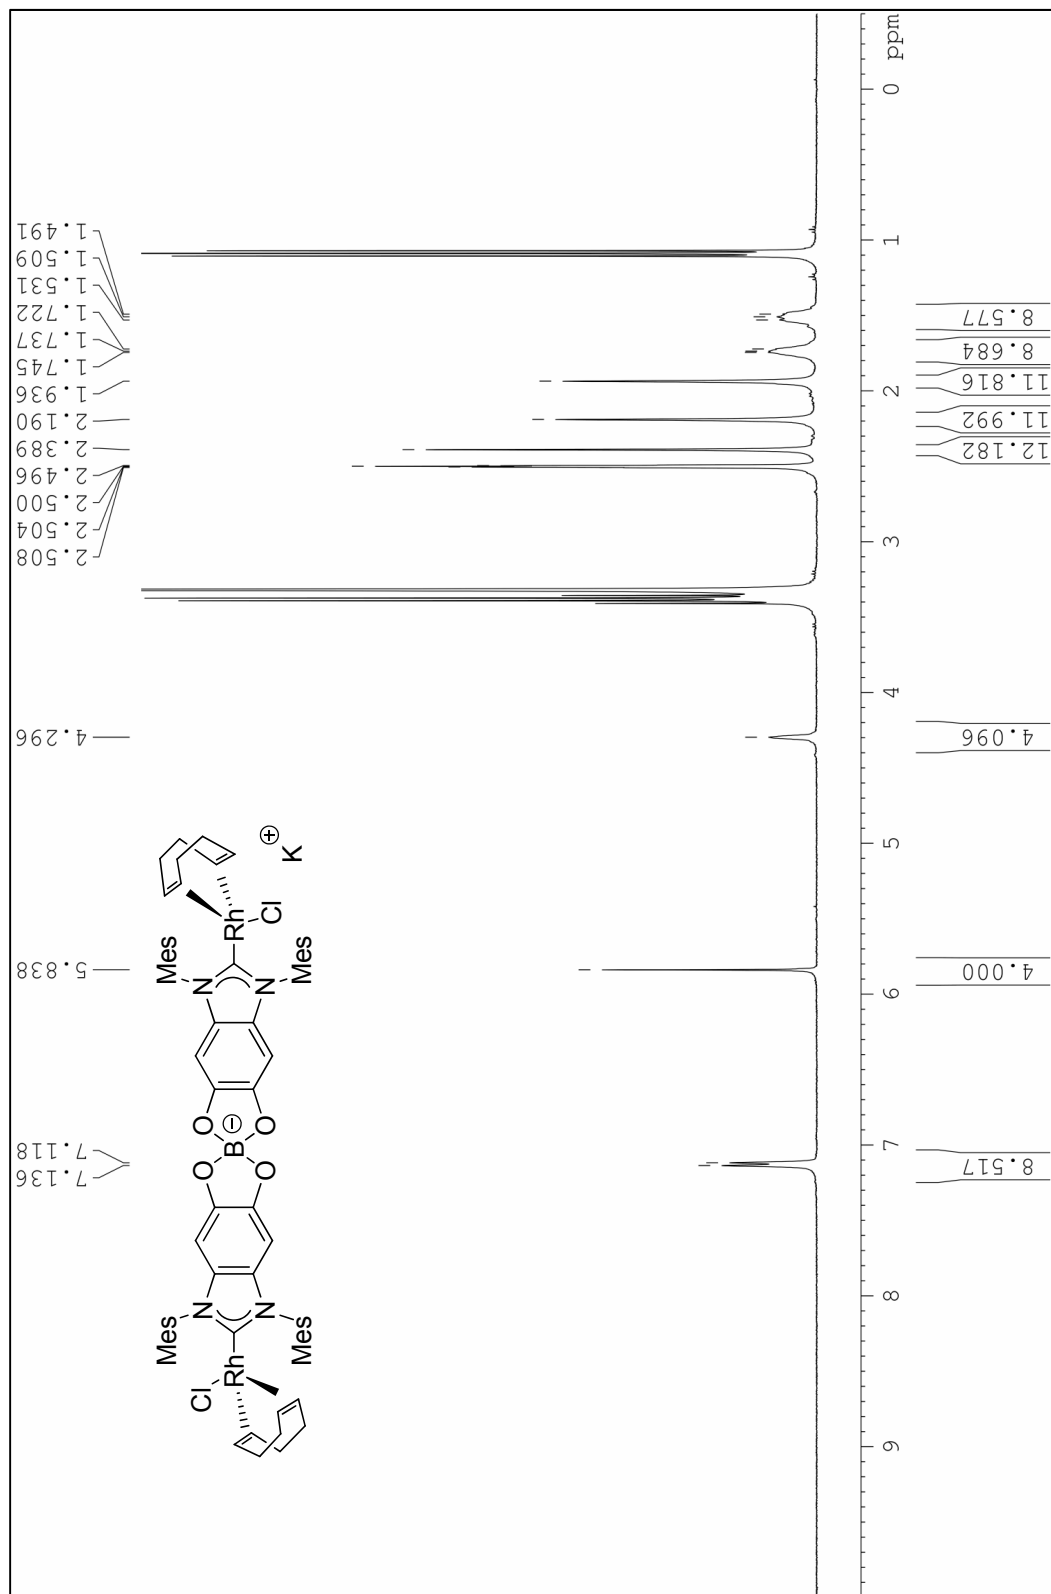

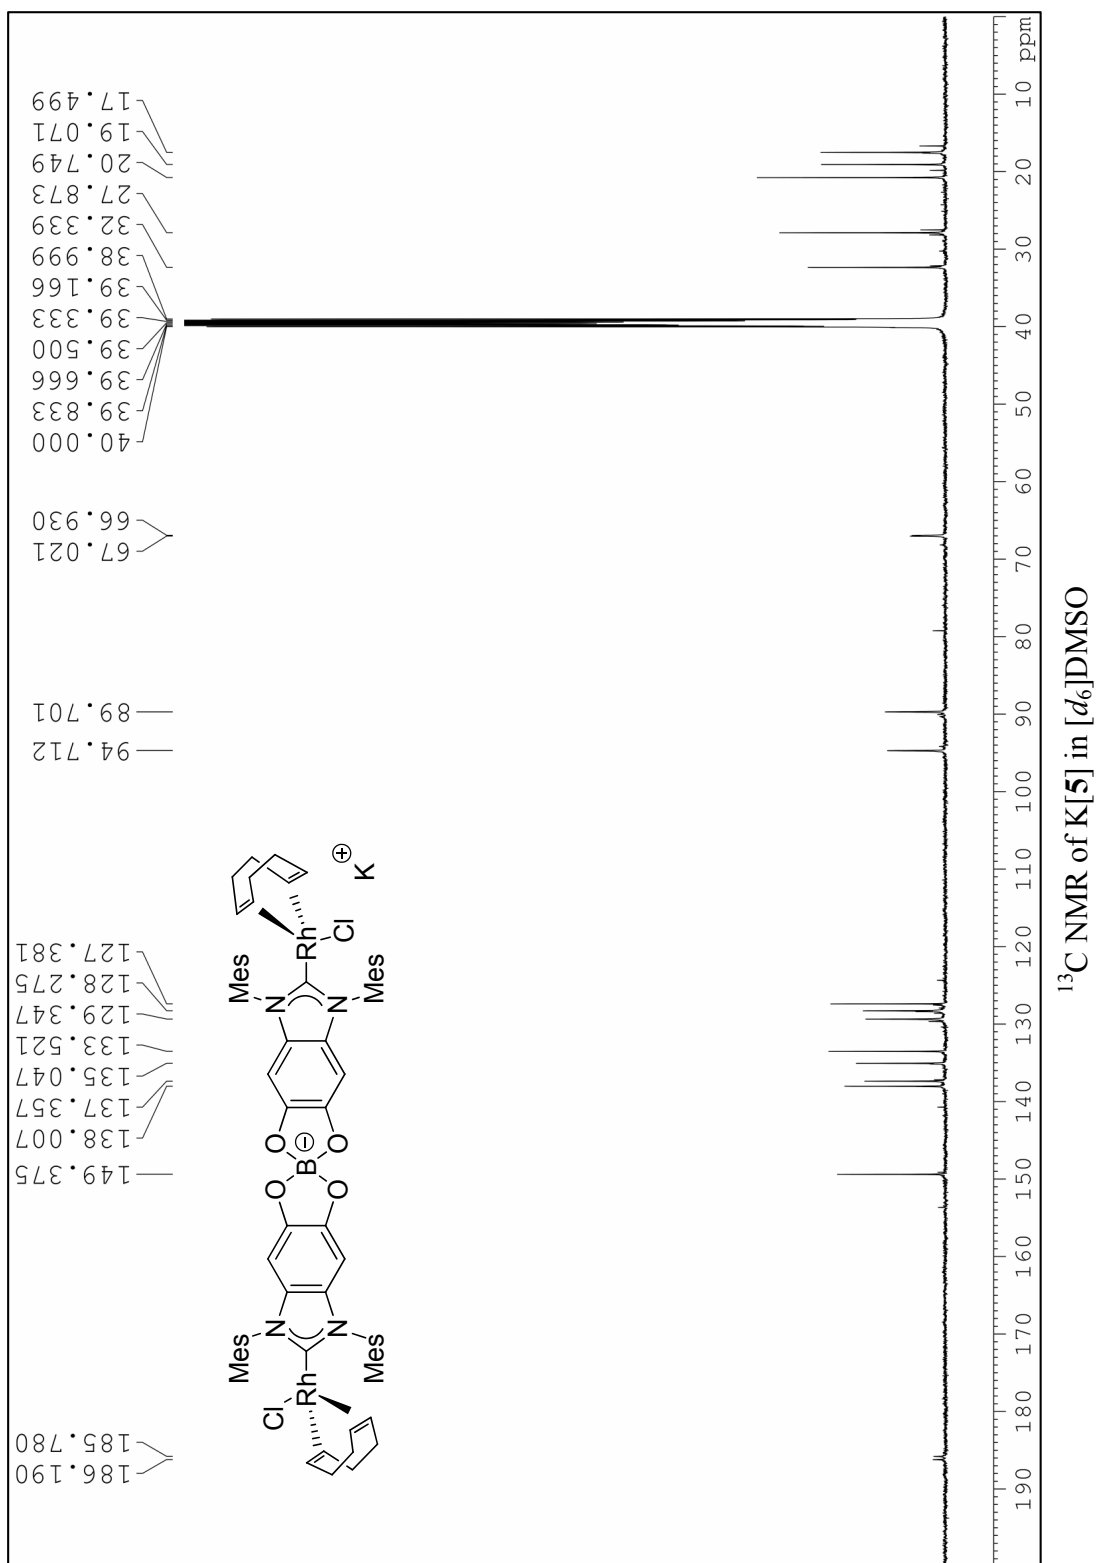

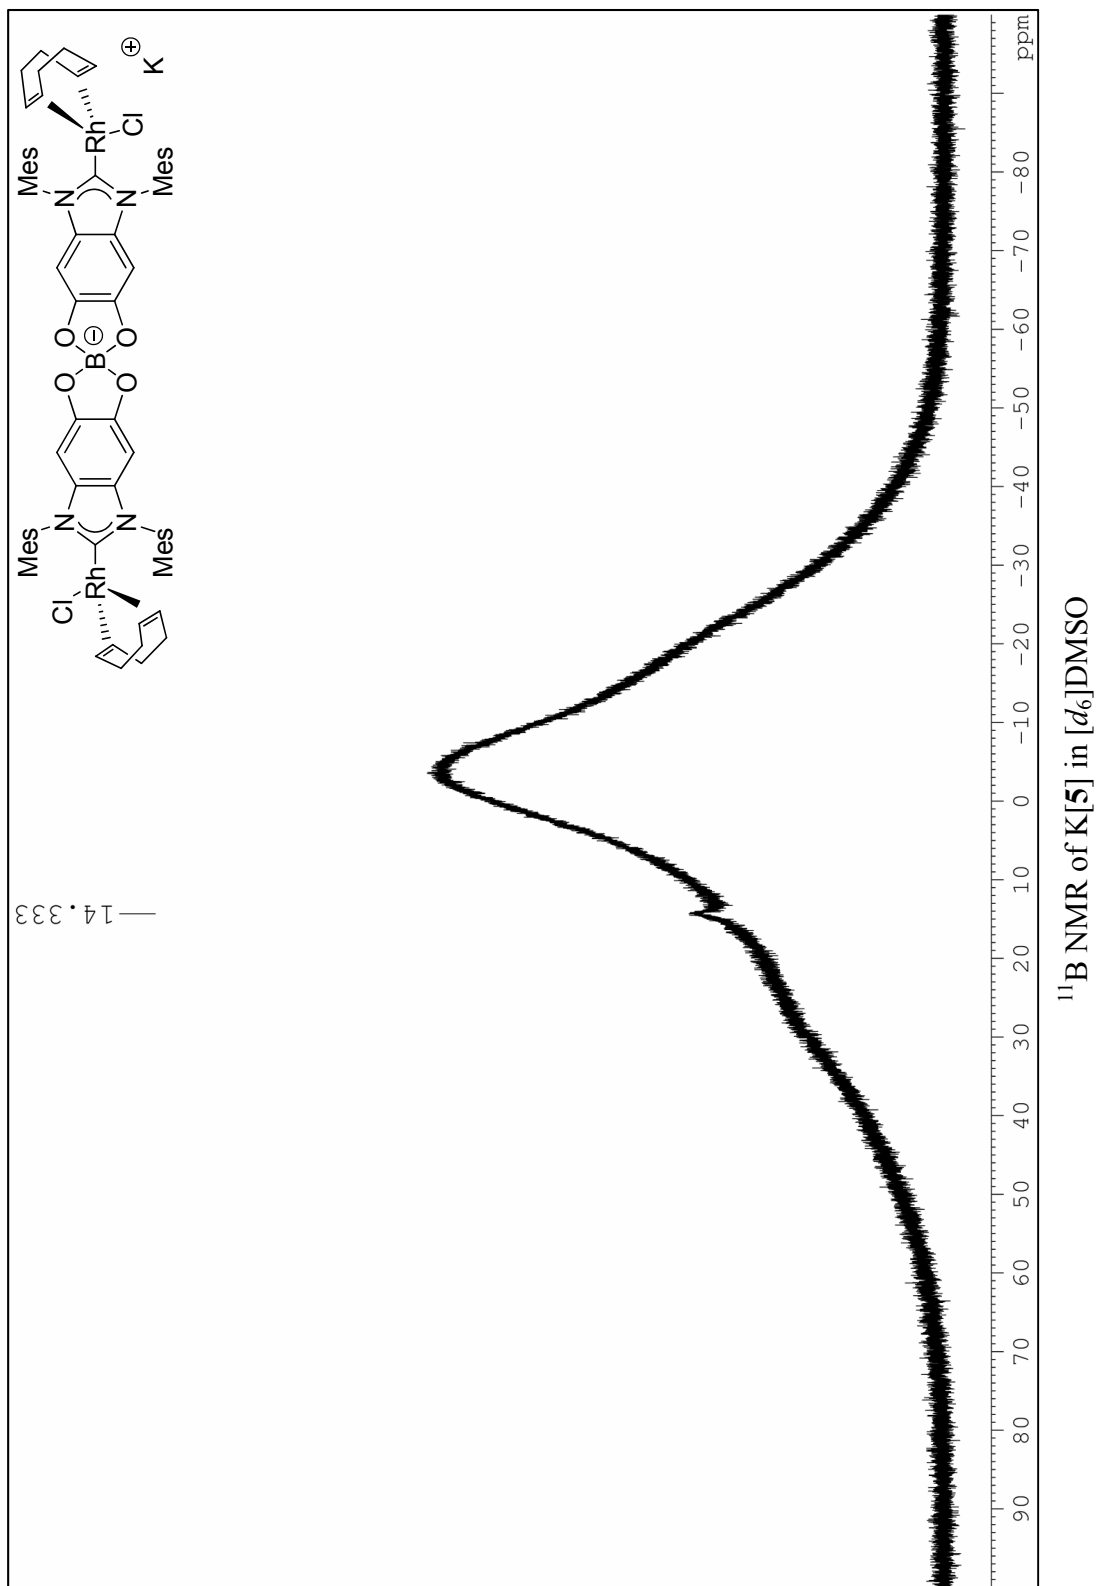

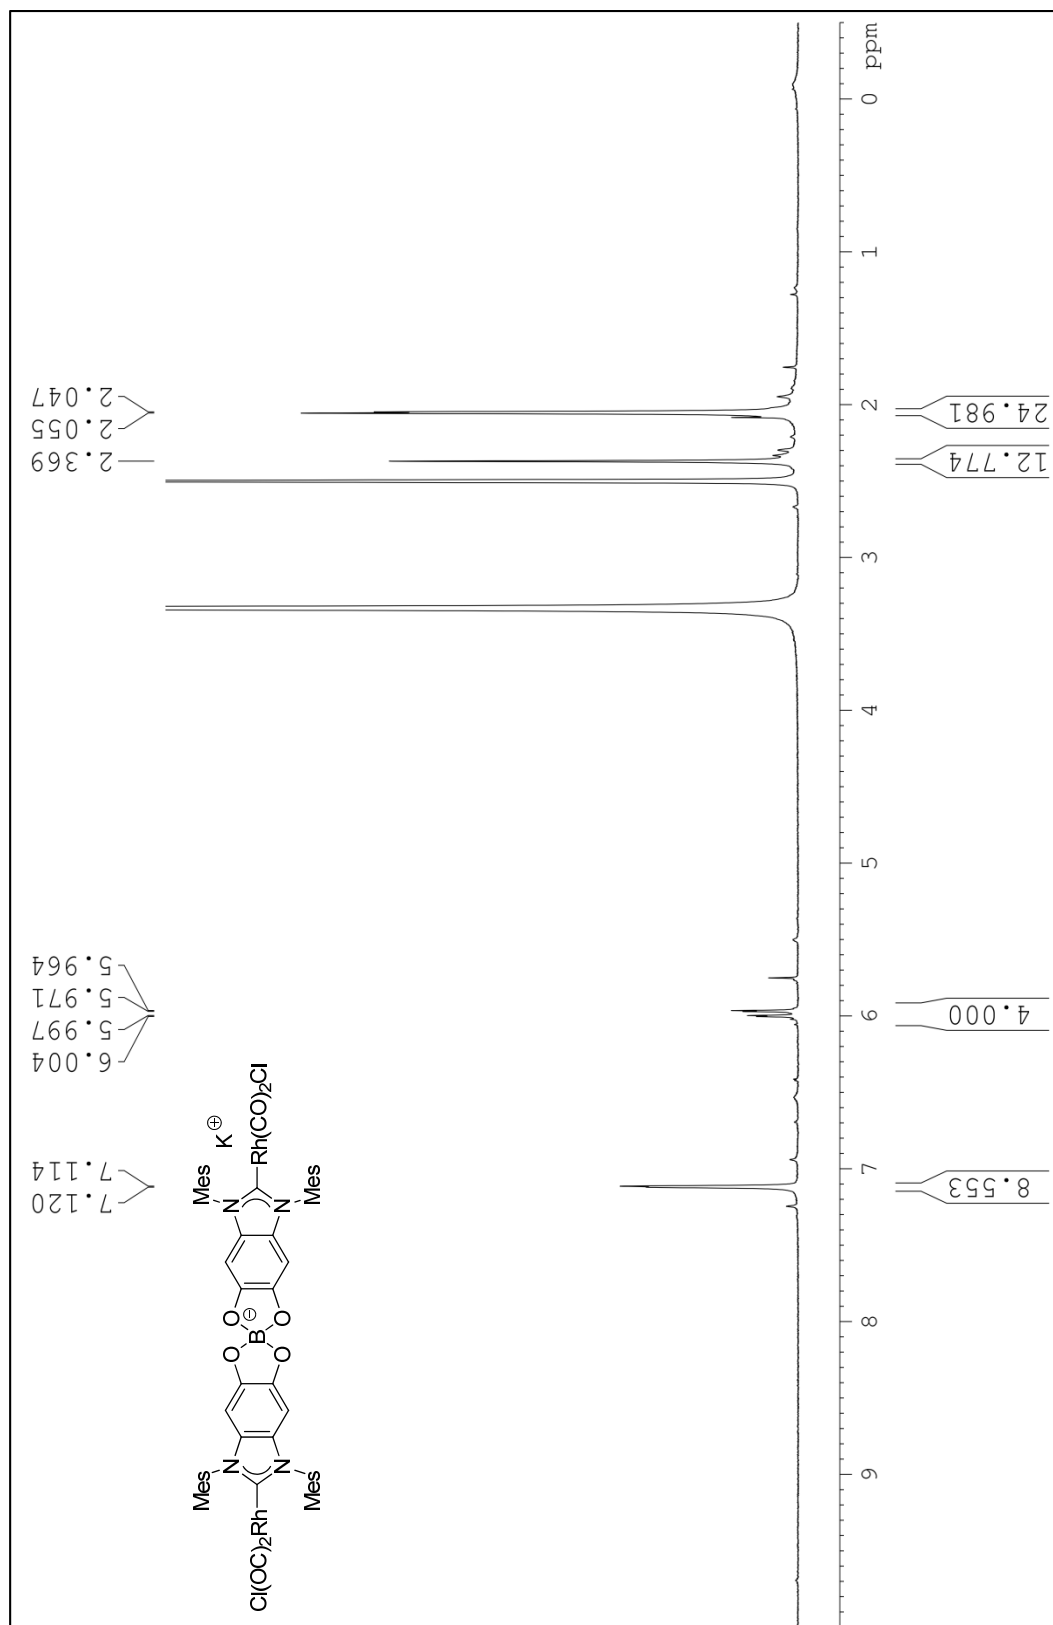

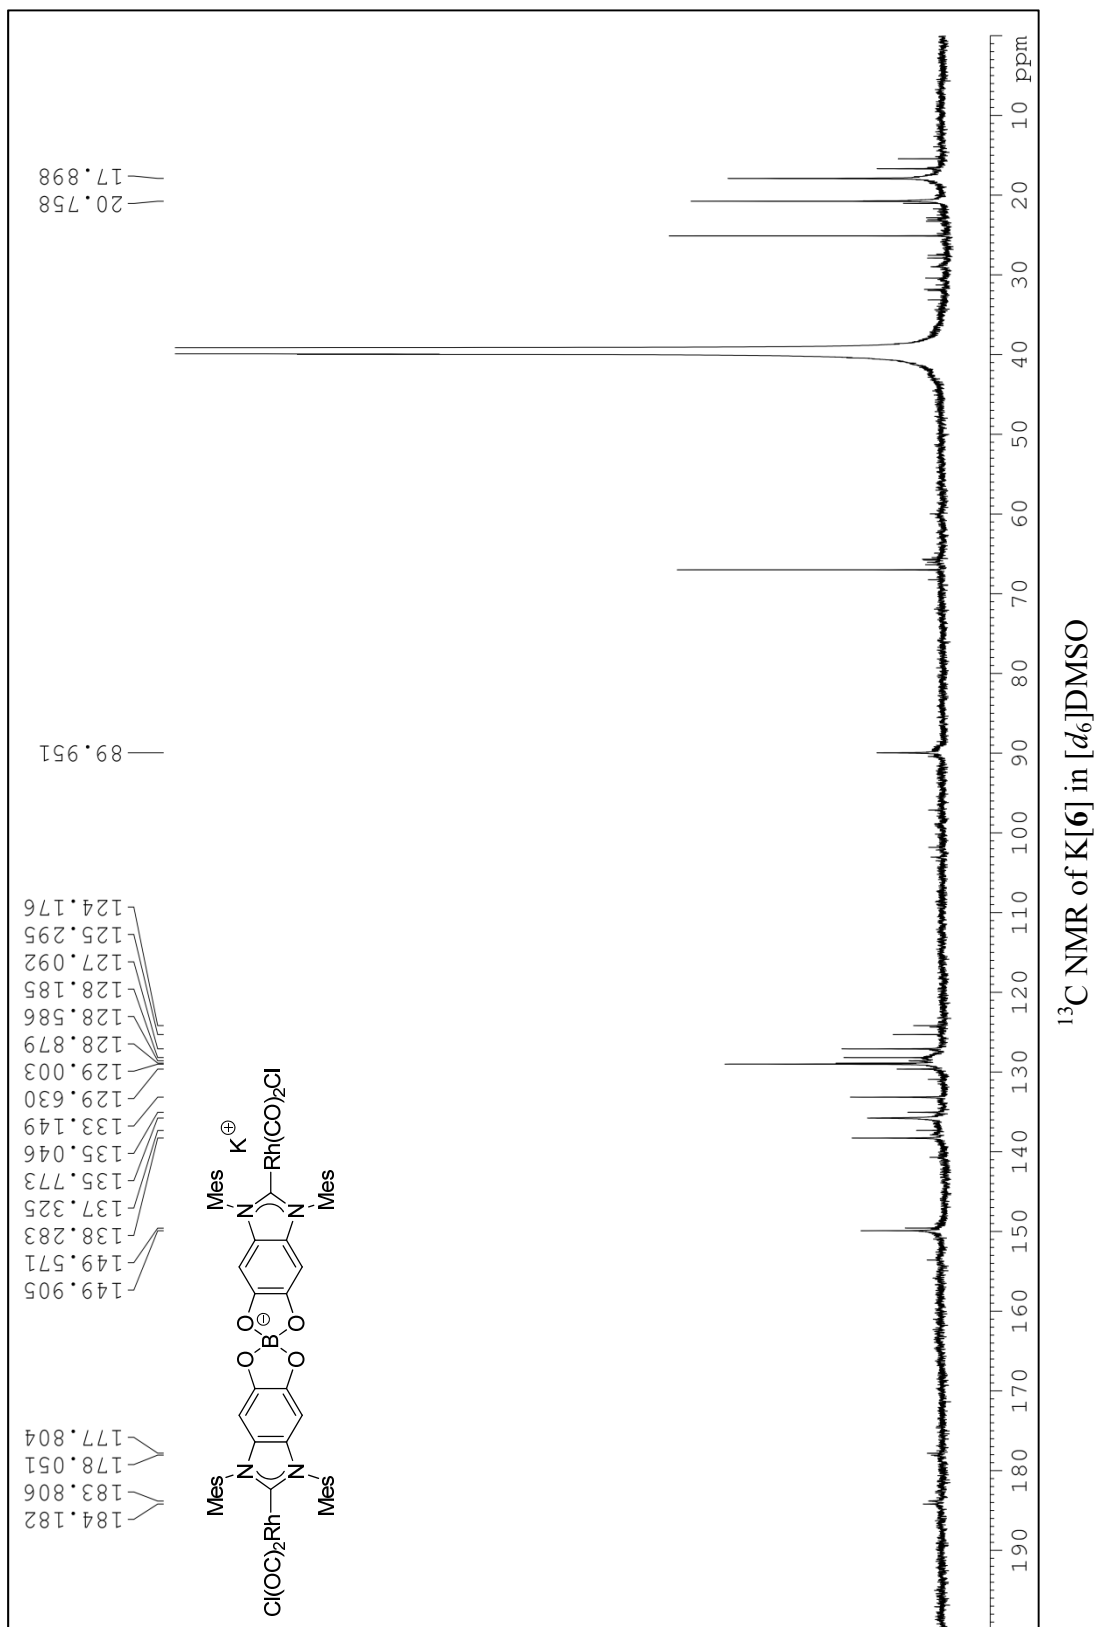



## HR-ESI-MS for 5,6-dimethoxy-1,3-dimesitylbenzimidazolium tetrafluoroborate

### Mass Spectrum SmartFormula Report

#### Analysis Info

Analysis Name D:\Data\FishMS20130823\_Mes-imidzolium\_pos\_wide000001.d  
Method tune\_wide.m  
Sample Name TuningMix 1:100  
Comment

Acquisition Date 8/23/2013 5:24:14 PM  
Operator BDAL@DE  
Instrument / Ser# micrOTOF-Q 10183

#### Acquisition Parameter

|             |          |                       |           |                  |           |
|-------------|----------|-----------------------|-----------|------------------|-----------|
| Source Type | ESI      | Ion Polarity          | Positive  | Set Nebulizer    | 0.4 Bar   |
| Focus       | Active   | Set Capillary         | 4500 V    | Set Dry Heater   | 180 °C    |
| Scan Begin  | 50 m/z   | Set End Plate Offset  | -500 V    | Set Dry Gas      | 4.0 l/min |
| Scan End    | 3000 m/z | Set Collision Cell RF | 600.0 Vpp | Set Divert Valve | Source    |

#### +MS, 0.4min #24

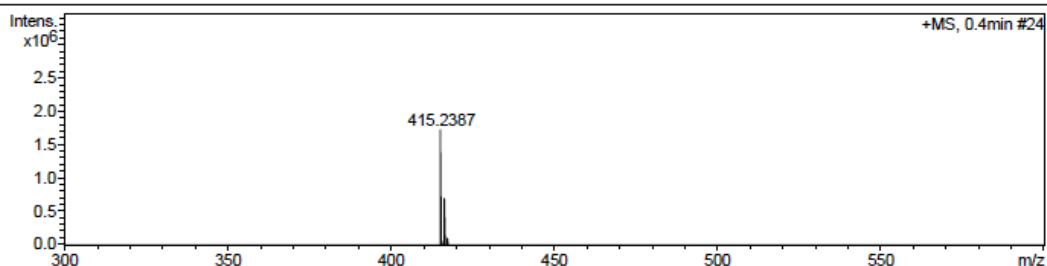

| Meas. m/z | # | Formula           | Score  | m/z      | err [mDa] | err [ppm] | mSigma | rdb  | e <sup>-</sup> Conf | N-Rule |
|-----------|---|-------------------|--------|----------|-----------|-----------|--------|------|---------------------|--------|
| 415.2387  | 1 | C 27 H 31 N 2 O 2 | 100.00 | 415.2380 | -0.7      | -1.6      | 52.9   | 13.5 | even                | ok     |

#### +MS, 0.4min #24

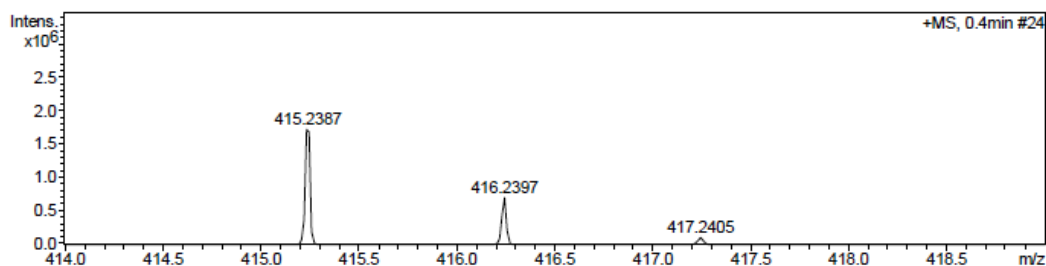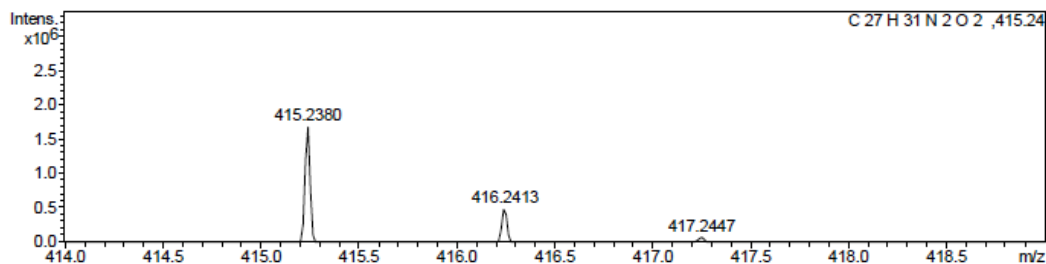

#### +MS, 0.4min #24

## HR-ESI-MS for K[4]

### Mass Spectrum SmartFormula Report

#### Analysis Info

Analysis Name D:\Data\FishMS20130610\_BH3NHC\_neg\_wide000002.d  
Method tune\_wide\_neg\_20130103.m  
Sample Name TuningMix 1:100  
Comment

Acquisition Date 6/10/2013 6:01:40 PM

Operator BDAL@DE  
Instrument / Ser# micrOTOF-Q 10183

#### Acquisition Parameter

|             |          |                       |           |                  |           |
|-------------|----------|-----------------------|-----------|------------------|-----------|
| Source Type | ESI      | Ion Polarity          | Negative  | Set Nebulizer    | 0.4 Bar   |
| Focus       | Active   | Set Capillary         | 3300 V    | Set Dry Heater   | 180 °C    |
| Scan Begin  | 50 m/z   | Set End Plate Offset  | -500 V    | Set Dry Gas      | 4.0 l/min |
| Scan End    | 3000 m/z | Set Collision Cell RF | 600.0 Vpp | Set Divert Valve | Source    |

#### -MS, 0.5-0.6min #(32-33)

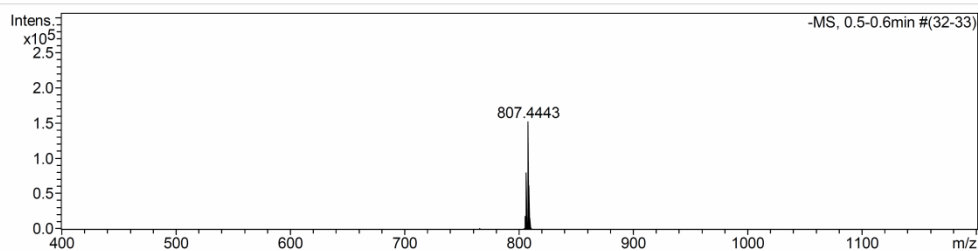

| Meas. m/z | # | Formula                                                                      | Score  | m/z      | err [mDa] | err [ppm] | mSigma | rdb  | e <sup>-</sup> Conf | N-Rule |
|-----------|---|------------------------------------------------------------------------------|--------|----------|-----------|-----------|--------|------|---------------------|--------|
| 807.4443  | 1 | C <sub>50</sub> H <sub>54</sub> B <sub>3</sub> N <sub>4</sub> O <sub>4</sub> | 100.00 | 807.4452 | 0.9       | 1.2       | 35.6   | 27.5 | even                | ok     |

#### -MS, 0.5-0.6min #(32-33)

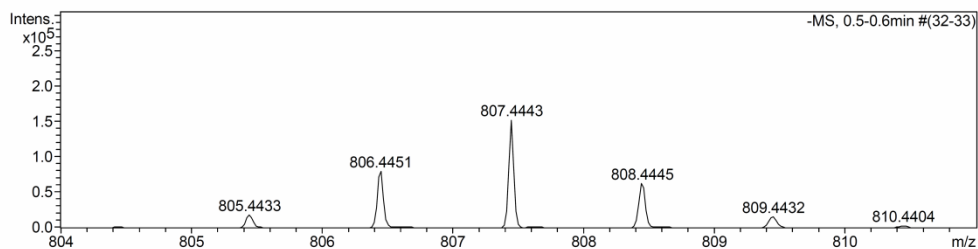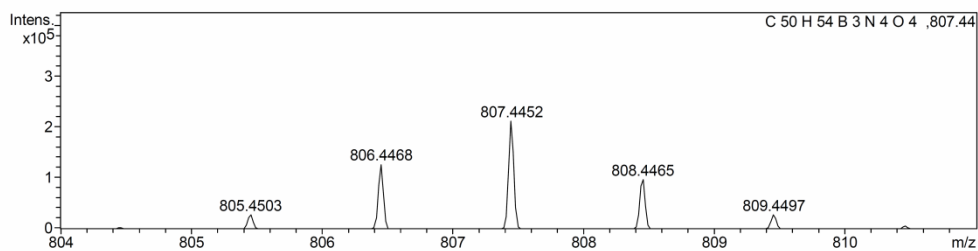

## HR-ESI-MS for K[5]

### Mass Spectrum SmartFormula Report

#### Analysis Info

Analysis Name D:\Data\Fish\MS20130613\_RhCODNHC\_neg\_wide000001.d  
Method tune\_wide\_neg\_20130103.m  
Sample Name TuningMix 1:100  
Comment

Acquisition Date 6/13/2013 12:10:56 PM

Operator BDAL@DE  
Instrument / Ser# micrOTOF-Q 10183

#### Acquisition Parameter

|             |          |                       |           |                  |           |
|-------------|----------|-----------------------|-----------|------------------|-----------|
| Source Type | ESI      | Ion Polarity          | Negative  | Set Nebulizer    | 0.4 Bar   |
| Focus       | Active   | Set Capillary         | 3300 V    | Set Dry Heater   | 180 °C    |
| Scan Begin  | 50 m/z   | Set End Plate Offset  | -500 V    | Set Dry Gas      | 4.0 l/min |
| Scan End    | 3000 m/z | Set Collision Cell RF | 600.0 Vpp | Set Divert Valve | Source    |

#### -MS, 1.8-1.8min #(107-108)

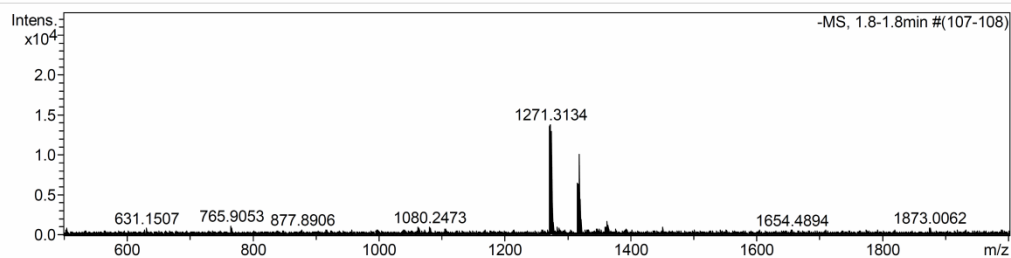

| Meas. m/z | # | Formula                       | Score  | m/z       | err [mDa] | err [ppm] | mSigma | rdb  | e <sup>-</sup> Conf | N-Rule |
|-----------|---|-------------------------------|--------|-----------|-----------|-----------|--------|------|---------------------|--------|
| 1271.3134 | 1 | C 66 H 72 B Cl 2 N 4 O 4 Rh 2 | 100.00 | 1271.3150 | 0.5       | 0.4       | 26.8   | 33.5 | even                | ok     |

#### -MS, 1.8-1.8min #(107-108)

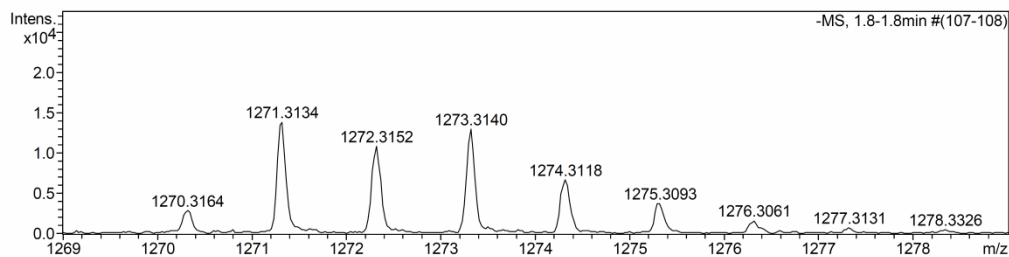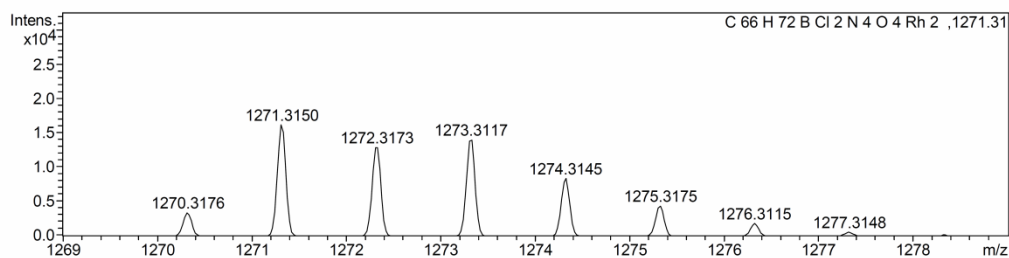

## HR-ESI-MS for K[6]

### Mass Spectrum SmartFormula Report

#### Analysis Info

Analysis Name D:\Data\Fish\MS20130703\_RhCO\_neg\_wide000002.d  
Method tune\_wide\_neg\_20130103.m  
Sample Name TuningMix 1:100  
Comment

Acquisition Date 7/3/2013 5:47:51 PM

Operator BDAL@DE  
Instrument / Ser# micrOTOF-Q 10183

#### Acquisition Parameter

|             |          |                       |           |                  |           |
|-------------|----------|-----------------------|-----------|------------------|-----------|
| Source Type | ESI      | Ion Polarity          | Negative  | Set Nebulizer    | 0.4 Bar   |
| Focus       | Active   | Set Capillary         | 3300 V    | Set Dry Heater   | 180 °C    |
| Scan Begin  | 50 m/z   | Set End Plate Offset  | -500 V    | Set Dry Gas      | 4.0 l/min |
| Scan End    | 3000 m/z | Set Collision Cell RF | 600.0 Vpp | Set Divert Valve | Source    |

#### -MS, 1.3-1.3min #(75-77)

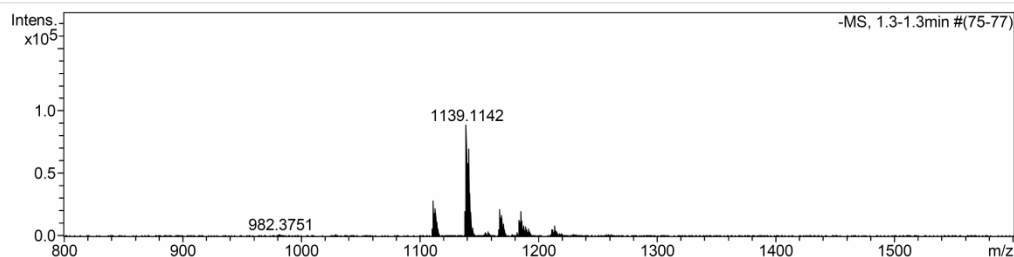

| Meas. m/z | # | Formula                                                                                                      | Score  | m/z       | err [mDa] | err [ppm] | mSigma | rdb  | e <sup>-</sup> Conf | N-Rule |
|-----------|---|--------------------------------------------------------------------------------------------------------------|--------|-----------|-----------|-----------|--------|------|---------------------|--------|
| 1166.1067 | 1 | C <sub>54</sub> H <sub>48</sub> B <sub>2</sub> Cl <sub>2</sub> N <sub>4</sub> O <sub>8</sub> Rh <sub>2</sub> | 100.00 | 1167.1067 | 2.7       | 2.3       | 26.5   | 33.5 | even                | ok     |

#### -MS, 1.3-1.3min #(75-77)

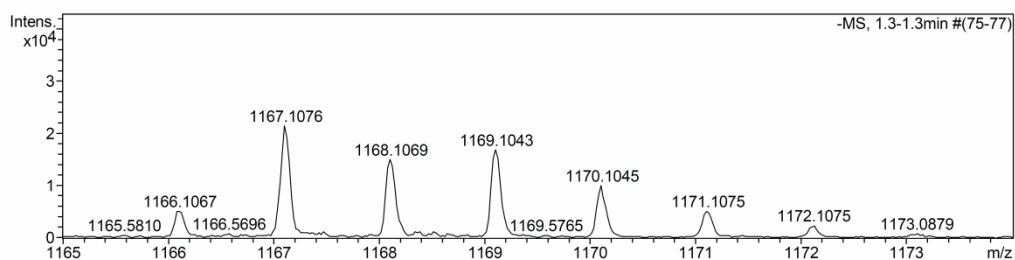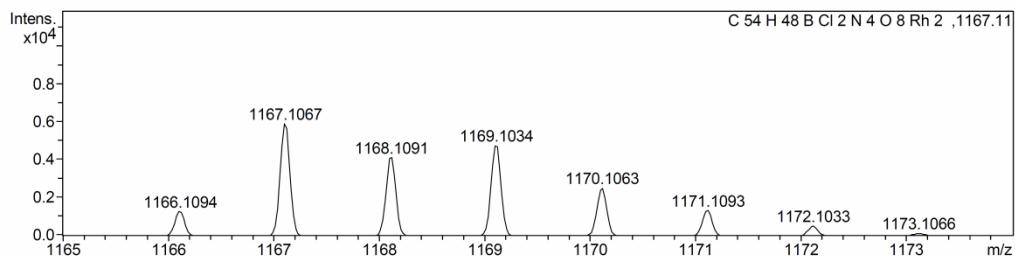

# HR-ESI-MS for K[6]

## [6]<sup>-</sup> - CO

### Mass Spectrum SmartFormula Report

#### Analysis Info

Analysis Name D:\Data\Fish\Data\2013\130703\MS20130703\_RhCO\_neg\_wide000002.d  
Method tune\_wide\_neg\_20130103.m  
Sample Name TuningMix 1:100  
Comment  
Acquisition Date 7/3/2013 5:47:51 PM  
Operator BDAL@DE  
Instrument / Ser# micrOTOF-Q 10183

#### Acquisition Parameter

Source Type ESI Ion Polarity Negative Set Nebulizer 0.4 Bar  
Focus Active Set Capillary 3300 V Set Dry Heater 180 °C  
Scan Begin 50 m/z Set End Plate Offset -500 V Set Dry Gas 4.0 l/min  
Scan End 3000 m/z Set Collision Cell RF 600.0 Vpp Set Divert Valve Source

#### -MS, 1.3-1.3min #(75-77)

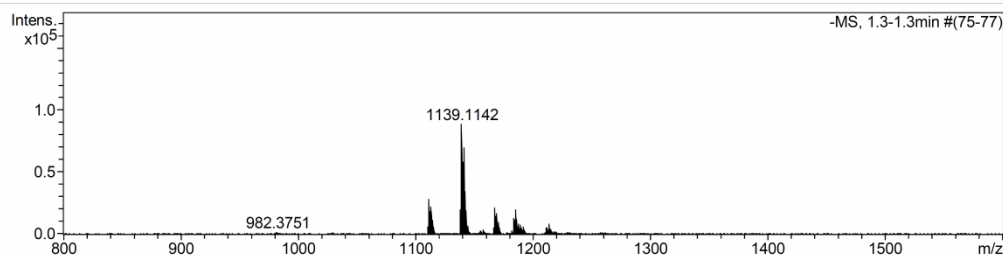

| Meas. m/z | # | Formula                       | Score  | m/z       | err [mDa] | err [ppm] | mSigma | rdb  | e <sup>-</sup> Conf | N-Rule |
|-----------|---|-------------------------------|--------|-----------|-----------|-----------|--------|------|---------------------|--------|
| 1139.1142 | 1 | C 53 H 48 B Cl 2 N 4 O 7 Rh 2 | 100.00 | 1139.1117 | -2.4      | -2.1      | 18.0   | 32.5 | even                | ok     |
| 1166.1067 | 1 | C 54 H 48 B Cl 2 N 4 O 8 Rh 2 | 100.00 | 1167.1067 | 2.7       | 2.3       | 26.5   | 33.5 | even                | ok     |

#### -MS, 1.3-1.3min #(75-77)

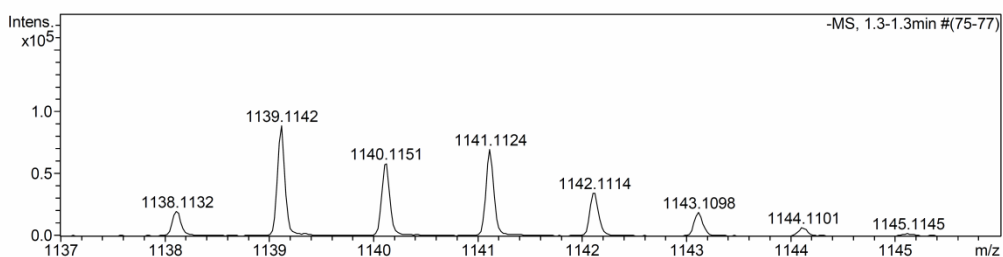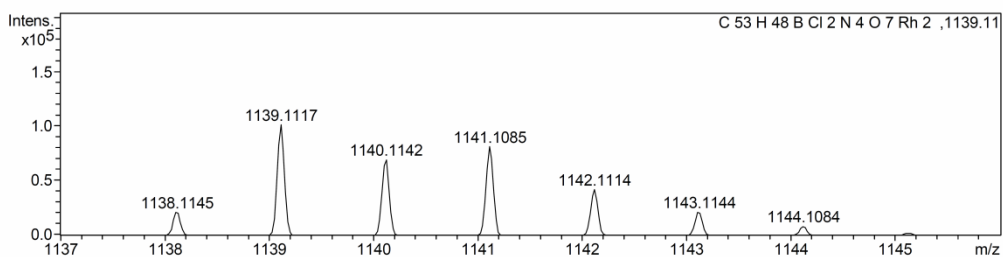

Supplement: c3dt52131a.pdf [file c3dt52131a.pdf]
